# Supplementary material for: Associations between Circulating IGF-1 Concentrations, Disease Status and the Leukocyte Transcriptome in Early Lactation Dairy Cows
Source: MDPI journal article supplement (doi:10.3390/ruminants1020012), 2021-11-25
Supplement: s1 [file s1]

Archive with 2 entries (2 files):
- Supplemenary Tables and Figure/Figure S1.pdf
- Supplemenary Tables and Figure/IGF Supplementary Tables_9Oct2021.xlsx
