# Supplementary material for: Associations between Circulating IGF-1 Concentrations, Disease Status and the Leukocyte Transcriptome in Early Lactation Dairy Cows
Source: MDPI journal article supplement (doi:10.3390/ruminants1020012), 2021-11-25
Supplement: s1 [file s1 › Supplemenary Tables and Figure/IGF Supplementary Tables_9Oct2021.xlsx]

## Sheet: Table S1
Table S1. List of DEG with FC≥1.2 and FDR P <0.05 with higher expression in cows
with LOW IGF1 (<35 ng/ml, n = 35) in comparison with HIGH IGF1 (>100 ng/ml, n = 43) in leucocytes
of cows at 14 days in milk, based on the global transcriptome.
Gene Symbol	Max group mean (RPKM)	Log₂ fold change	Fold change	P-value	FDR p-value
AAED1	1.41439	0.333452	1.26002	0.00147408	0.0217493
AAK1	1.47509	0.355086	1.27906	1.16652e-06	0.000122112
AATK	0.222623	0.940062	1.91861	5.3012e-06	0.000365529
ABCA10	4.48519	0.408818	1.3276	0.000797874	0.0138635
ABCA3	6.37077	0.360287	1.28368	1.94513e-05	0.000938207
ABCA5	8.6386	0.261897	1.19905	7.77676e-06	0.00048241
ABCA6	12.7774	0.794762	1.73479	3.60346e-10	2.39866e-07
ABCA9	0.284777	0.488169	1.40266	0.00278213	0.0344423
ABHD1	3.45633	0.266526	1.20291	0.0015298	0.0223428
ABHD12B	0.362891	0.45525	1.37102	0.00144962	0.0214984
ABHD5	5.70763	0.281262	1.21526	4.30585e-05	0.00169753
ABO	2.00054	0.487463	1.40198	0.000138997	0.00400434
ACE	0.716371	0.641819	1.56029	0.000436714	0.0089765
ACE2	0.115464	0.752906	1.68518	0.000874974	0.0146878
ACER2	1.6188	0.455839	1.37158	1.11074e-05	0.000618123
ACER3	3.38861	0.280019	1.21421	0.000663924	0.0121464
ACSL6	24.1228	0.481926	1.39661	1.20107e-07	2.1384e-05
ACVR1	1.57481	0.314148	1.24328	0.000533071	0.0103313
ACVR1B	7.47911	0.670489	1.59161	6.88249e-09	2.29068e-06
ACVR2B	1.1867	0.485878	1.40044	2.91167e-07	3.90637e-05
ADAM19	31.8145	0.281602	1.21554	0.00332146	0.0391051
ADAMTS2	10.3014	0.552682	1.46681	2.21963e-07	3.22809e-05
ADAP1	8.81394	0.303729	1.23433	1.14431e-05	0.000626032
ADARB1	0.924547	0.633252	1.55106	1.87079e-07	2.94343e-05
ADCY9	2.1942	0.306557	1.23675	1.18258e-05	0.000641594
ADGB	0.493475	0.299857	1.23102	0.00253999	0.0320873
ADGRG3	2.51003	1.26576	2.40454	2.98963e-08	7.28754e-06
ADM	0.0654015	1.53484	2.89757	2.67537e-05	0.00116926
ADORA2A	2.90156	0.388581	1.30911	2.20825e-05	0.00101375
AGBL4	0.142421	2.49835	5.6504	4.28669e-09	1.54562e-06
AIF1	110.222	0.35867	1.28224	0.00128424	0.0197568
AIF1L	0.137126	0.920017	1.89214	0.00161403	0.0233367
AK4	0.407449	0.987124	1.98223	2.21556e-11	2.57956e-08
ALB	0.526067	3.64166	12.481	1.46109e-05	0.000743737
ALOX12	0.430904	0.340657	1.26633	0.00307895	0.0368983
ALOX5AP	24.6456	0.627009	1.54436	8.54775e-06	0.000519074
ALPK2	0.448434	0.347083	1.27199	5.54635e-05	0.00202086
ALPL	2.39592	2.38006	5.2056	3.54229e-11	3.60626e-08
ALS2CR12	0.175243	0.664764	1.58531	4.95441e-05	0.00187628
ANG	56.392	0.552048	1.46617	6.16402e-08	1.25507e-05
ANK2	0.10112	0.381316	1.30253	0.00373028	0.0424458
ANKFY1	17.5448	0.287971	1.22092	9.12088e-05	0.0029746
ANKRD22	2.20228	0.45738	1.37305	0.000991036	0.0161657
ANKRD29	0.233425	0.651965	1.57131	0.00124977	0.0193123
ANKRD35	0.115954	0.781052	1.71838	8.71322e-05	0.00288609
ANKRD50	0.858432	0.367536	1.29015	6.60052e-05	0.00232658
ANXA5	38.7583	0.281386	1.21536	0.000253594	0.00612982
AP1M2	0.315047	0.588694	1.50388	0.000893979	0.0149057
AP2A1	8.2572	0.266719	1.20307	7.05309e-06	0.000448779
APH1B	2.61771	0.338585	1.26452	0.00298218	0.0361179
AQP9	4.10059	0.446662	1.36288	1.41213e-05	0.000732789
AREG	0.70204	0.6896	1.61284	0.000782755	0.0136654
ARHGAP21	1.95991	0.383754	1.30473	3.31917e-06	0.000259931
ARHGAP28	0.592014	0.420064	1.33799	0.00185647	0.025769
ARHGAP5	2.01733	0.266534	1.20291	0.00388079	0.0434724
ARHGEF37	0.103933	0.896175	1.86112	0.00243899	0.0311295
ASCL4	0.912449	0.328457	1.25567	0.00108314	0.0173307
ASPH	1.38093	0.360453	1.28383	2.00531e-07	3.07133e-05
ASPHD2	1.65086	0.515962	1.42995	1.04595e-05	0.000589652
ASS1	17.0049	0.374092	1.29602	0.000859412	0.0145335
ATG16L2	20.0274	0.295186	1.22704	0.00110343	0.0175848
ATOX1	3.85923	0.289043	1.22183	4.61637e-05	0.00178737
ATP10A	0.0551257	2.10912	4.31428	6.58576e-07	7.56724e-05
ATP13A3	26.5738	0.495555	1.40986	1.75204e-12	7.58062e-09
ATP6V1G3	0.0229744	1.96755	3.91102	0.00434451	0.0468532
ATP8B4	10.5868	0.422196	1.33997	4.29542e-05	0.00169728
ATRN	9.89326	0.288661	1.22151	2.52084e-07	3.46388e-05
AVPI1	0.582382	0.414418	1.33276	0.00169924	0.0241848
BAG3	3.06253	0.31651	1.24531	0.000217801	0.00547096
BAHCC1	0.405361	0.337546	1.26361	0.00273687	0.0339499
BATF2	1.68959	0.857462	1.81185	2.53113e-05	0.00112036
BAZ2B	4.67666	0.389637	1.31006	1.15305e-05	0.000627541
BCL2L1	3.42331	0.309862	1.23959	0.00198713	0.0269612
BCL2L2	0.588921	0.745401	1.67644	1.09846e-11	1.72828e-08
BCL3	2.61437	0.523032	1.43697	4.53859e-05	0.00176779
BCL6	13.3904	0.435158	1.35206	0.00128091	0.0197546
BEND7	0.126323	0.478175	1.39298	0.000182138	0.00484964
BMPR2	6.18815	0.263183	1.20012	0.000211438	0.00539728
BMX	3.11169	1.6312	3.0977	3.76048e-09	1.41484e-06
BNC2	0.0199321	1.47982	2.78915	2.58636e-05	0.00114189
BRB	27.9567	1.13039	2.18918	2.05375e-08	5.73294e-06
BST1	6.59406	0.645239	1.564	7.25523e-06	0.000456605
BTBD19	0.179979	0.424728	1.34232	0.000417363	0.00868185
C10H15orf48	140.821	0.363351	1.28641	7.75222e-05	0.00264594
C11H9orf16	65.5811	0.482988	1.39764	0.000249551	0.00606597
C11H9orf50	0.213088	0.491101	1.40552	0.0019746	0.0268878
C1R	10.0823	0.665438	1.58605	0.000140744	0.00401956
C1RL	4.82829	0.412098	1.33062	0.000293614	0.00683006
C2	7.4629	0.650188	1.56937	0.000956716	0.0157544
C21H15orf39	3.33171	0.257829	1.19568	0.000689538	0.0124962
C23H6orf141	1.21048	0.401797	1.32115	0.000437473	0.00898143
C3AR1	2.67875	0.459028	1.37462	0.000670409	0.0122521
C7H19orf38	14.4859	0.360795	1.28413	6.0379e-05	0.00216352
C8G	1.67519	0.384742	1.30563	0.00129041	0.0197988
CA4	0.573708	1.31792	2.49306	5.78232e-09	2.00149e-06
CADPS2	0.637019	0.385747	1.30654	0.000343631	0.00757925
CALD1	8.01689	0.458063	1.3737	0.000793924	0.0138095
CAMKK1	1.4885	0.642106	1.56061	2.33612e-05	0.00105483
CAPN10	3.3388	0.282499	1.2163	0.000271829	0.00642697
CAPN3	0.775791	0.66298	1.58335	0.000488423	0.00967177
CAPNS2	1.80326	0.606424	1.52248	0.00117451	0.0183731
CARD10	0.327413	0.553633	1.46778	0.000442986	0.00906237
CARD19	9.10803	0.26806	1.20419	0.000431509	0.00888005
CARD9	9.14269	0.26989	1.20572	0.00188862	0.0260657
CARMIL1	0.447474	0.367065	1.28973	0.00152593	0.0223428
CATHL4	0.246019	1.77334	3.41844	0.0037633	0.0426253
CAVIN3	2.21251	0.414991	1.33329	0.000449187	0.00914597
CBARP	0.0772466	0.425566	1.3431	0.00397369	0.0442552
CC2D2A	0.0887893	0.721181	1.64853	0.000180852	0.00483853
CCDC8	0.24744	1.3986	2.63646	1.25276e-05	0.000669184
CCDC9B	0.940847	0.50883	1.4229	3.81275e-05	0.00155998
CCL16	9.14512	0.691586	1.61506	0.000303236	0.00696036
CCL8	0.0974535	1.35201	2.55268	0.00130341	0.0199101
CCR1	61.1837	0.340455	1.26616	0.0023558	0.0302686
CCSER1	1.03377	0.300775	1.23181	0.000915565	0.0151924
CD14	29.0798	0.75617	1.689	2.88744e-09	1.14485e-06
CD163	60.3351	1.02165	2.03024	1.23897e-11	1.7869e-08
CD24	35.7389	0.665121	1.5857	8.59175e-05	0.00285957
CD36	0.36573	1.46721	2.76486	2.25689e-07	3.22809e-05
CD55	75.9646	0.264574	1.20128	0.000854627	0.0145335
CDA	7.73325	0.437723	1.35447	0.00220622	0.0291474
CDC42BPA	0.755131	0.322895	1.25084	0.00018942	0.00497464
CDC42BPB	0.792554	0.771852	1.70746	3.33465e-08	7.61183e-06
CDH20	0.252608	0.804946	1.74708	0.00288063	0.0353228
CDH26	0.0514691	1.67111	3.1846	3.05932e-08	7.35385e-06
CDKN1A	6.65114	0.507954	1.42203	0.000348934	0.0076637
CDS1	0.131354	0.709371	1.63509	0.000544983	0.0104779
CEBPB	18.7059	0.445424	1.36171	9.44939e-05	0.00303979
CEBPD	96.4106	0.522177	1.43612	2.09703e-07	3.15594e-05
CELSR3	0.0273419	0.930299	1.90567	2.10002e-05	0.000982297
CFAP126	1.00966	0.316764	1.24553	0.000299894	0.0069134
CFAP69	0.168987	1.19003	2.28158	4.12251e-10	2.53781e-07
CFB	1.23638	1.04549	2.06407	4.89229e-09	1.72798e-06
CFI	1.20611	0.871357	1.82938	0.000111898	0.00344595
CFP	47.6014	0.404573	1.3237	1.0372e-05	0.000589652
CHI3L1	59.3748	0.66617	1.58685	6.17373e-09	2.09507e-06
CHRNA2	0.130722	0.591717	1.50704	0.00253866	0.0320873
CISH	11.5726	0.285407	1.21875	0.000159198	0.00439431
CKB	19.4217	0.353316	1.27749	0.00252222	0.0319328
CLCN5	1.4114	0.315799	1.2447	3.2337e-06	0.000255551
CLDN12_1	0.831281	0.299779	1.23096	0.00422268	0.0462544
CLDND2	0.386395	0.452779	1.36867	0.00347074	0.0403412
CLEC1B	0.94411	1.34784	2.54531	6.60226e-07	7.56724e-05
CLEC2B	2.80642	0.44088	1.35743	8.91319e-05	0.0029383
CLEC4D	25.7989	0.304595	1.23507	0.00221374	0.0292021
CLIC2	2.54663	0.511805	1.42583	0.000101354	0.00321271
CLIC5	8.28027	0.319829	1.24818	0.000163607	0.00447322
CLU	14.5052	0.471382	1.38644	0.00231933	0.0299781
CMKLR1	2.37057	0.610264	1.52654	0.000213226	0.00541017
CMTM4	0.68358	0.439853	1.35647	7.0705e-07	7.89479e-05
CNDP1	0.0470791	0.660779	1.58094	0.00196641	0.0267973
CNDP2	24.3118	0.403692	1.32289	1.95353e-07	3.01873e-05
CNKSR3	0.434013	0.678843	1.60086	4.64847e-05	0.00179578
CNTLN	1.03954	0.266836	1.20317	0.0007625	0.0133976
COL14A1	0.590813	0.329925	1.25695	0.00410295	0.0453547
COL5A3	0.179657	0.86529	1.82171	0.000921059	0.0152689
COL7A1	0.191214	0.496864	1.41114	2.9601e-06	0.000241653
COMT	6.42036	0.277094	1.21175	0.00016106	0.00443157
CPNE2	1.13523	1.02847	2.03987	2.40262e-06	0.000204838
CPS1	0.0148395	3.05826	8.32966	0.000859597	0.0145335
CPT1A	38.937	0.479549	1.39431	3.95646e-06	0.000293881
CREB3L2	3.50818	0.377094	1.29872	6.07076e-06	0.000405663
CREB3L3	0.0849265	2.67758	6.39781	7.06167e-08	1.37322e-05
CRYBG3	0.533542	0.467178	1.3824	2.92011e-06	0.000241653
CRYZ	2.001	0.429912	1.34715	5.19596e-05	0.00192562
CSF1R	44.9774	0.45885	1.37445	7.71337e-06	0.00048241
CSF2RA	21.8917	0.32095	1.24915	5.28985e-05	0.00195623
CTHRC1	0.0172873	2.26085	4.79273	0.00444411	0.0475954
CTNND1	4.35036	0.351566	1.27595	0.00010485	0.00329336
CTSB	164.519	0.296307	1.228	0.000368392	0.0079202
CTSF	23.0859	0.316322	1.24515	1.58438e-06	0.00014822
CTSH	128.973	0.305179	1.23557	4.21531e-05	0.00167326
CTSV	0.0728477	1.31319	2.4849	0.000547957	0.0105138
CTTNBP2	0.368405	0.567908	1.48237	6.68043e-06	0.000436295
CTTNBP2NL	2.37468	0.436043	1.35289	0.000538371	0.0103991
CXCL8	19.8822	0.674585	1.59614	0.00290968	0.0355383
CYBRD1	6.29084	0.289866	1.22253	0.000115584	0.00352184
CYP4B1	0.0475791	1.3968	2.63316	0.000446617	0.00911382
CYP4V2	12.8985	0.336689	1.26285	8.33042e-08	1.60194e-05
DACH1	0.385539	0.540711	1.45469	0.000632252	0.0117156
DCBLD1	1.98065	0.483979	1.3986	1.17123e-06	0.000122112
DCBLD2	2.29998	0.266099	1.20255	3.35655e-05	0.00142034
DCSTAMP	1.65519	1.4339	2.70176	4.12465e-12	1.04475e-08
DEFB1	16.8851	0.543678	1.45768	0.00179604	0.0252716
DEFB10	8.31255	0.908292	1.87682	0.00396225	0.0441847
DEFB13	23.4944	0.881225	1.84194	0.00130778	0.0199416
DEFB4A	3.81946	1.10714	2.15419	5.25111e-06	0.000363524
DEFB7	31.0048	0.885024	1.8468	3.64747e-05	0.00149945
DENND2A	0.335896	0.585429	1.50048	0.000959104	0.0157637
DEPTOR	0.35653	0.49356	1.40791	1.95486e-05	0.000939798
DGKG	2.06247	0.608263	1.52442	5.62451e-08	1.17281e-05
DGKH	0.506183	0.796018	1.7363	6.95812e-12	1.33805e-08
DHRS7	15.3166	0.422094	1.33987	2.24902e-06	0.000193651
DIAPH2_1	2.67885	0.320437	1.24871	0.000115851	0.00352341
DIRAS3	0.226221	0.770674	1.70607	0.00201402	0.0272531
DLC1	1.3982	0.615888	1.5325	2.06223e-06	0.000179491
DMBT1	4.38924	4.01648	16.1838	1.61054e-22	1.39368e-18
DMRT3	0.0182463	1.78941	3.45674	0.000262747	0.00627223
DNAH9	0.230367	0.657627	1.57749	0.00356038	0.0411345
DNASE1L1	25.035	0.269133	1.20508	1.58624e-05	0.000795739
DOC2B	0.0692015	1.74114	3.343	3.52439e-05	0.00145925
DOCK1	2.8782	0.326217	1.25372	0.000102638	0.00323563
DOCK4	2.55246	0.431284	1.34843	1.33446e-06	0.000131224
DOCK5	0.78197	0.337455	1.26353	0.000553647	0.0105878
DPYD	17.1858	0.327587	1.25491	0.000173276	0.00469311
DPYS	0.180477	1.02292	2.03203	5.84612e-05	0.00210789
DRAM1	4.58282	0.409246	1.32799	1.19569e-06	0.000123177
DRD5	0.0560418	0.829442	1.777	0.00460379	0.0487028
DSEL	0.0271852	0.40903	1.32779	0.00483223	0.0504412
DUSP3	0.529246	0.305405	1.23577	0.0012834	0.0197568
DYNLT1	98.7752	0.439568	1.3562	0.000218326	0.00547619
DYRK3	2.08222	0.46164	1.37711	0.000701871	0.0126666
DYSF	5.11904	0.991841	1.98872	3.36792e-09	1.2953e-06
E2F3	2.95268	0.471123	1.38619	6.39886e-07	7.56724e-05
ECM1	7.25028	0.581196	1.49609	1.71656e-05	0.000851245
ECSCR	0.718226	0.411897	1.33043	0.000419963	0.00871498
EFEMP1	1.68394	1.40072	2.64033	2.76833e-08	6.9437e-06
EFHD1	0.0692384	1.61796	3.06941	0.000459661	0.00928279
EHD4	7.69362	0.273117	1.20842	0.00249738	0.0316646
EIF4E3	8.28587	0.428105	1.34547	1.36294e-06	0.000133268
ELMO3	0.534736	0.555649	1.46983	0.002328	0.0300677
ELN	3.36718	0.82132	1.76702	3.60961e-06	0.000280141
EMC3	58.793	0.29272	1.22495	1.14398e-05	0.000626032
EMILIN1	0.680825	0.450806	1.3668	0.00183702	0.0256605
EMILIN2	30.9068	0.303134	1.23382	0.00142159	0.0211898
ENPP2	5.00481	0.289887	1.22254	0.00033223	0.00745888
EPB41L3	5.81882	0.422742	1.34047	0.000107915	0.00335916
EPO	0.0103353	2.21136	4.6311	0.00195783	0.0267436
EREG	0.183909	2.44148	5.43198	8.98044e-09	2.87823e-06
ESYT3	0.471214	0.497028	1.4113	0.000251386	0.00608495
ETS2	4.24696	0.452448	1.36836	0.00194128	0.02658
ETV5	0.897613	0.463976	1.37934	0.00224194	0.0293727
EVC	0.0122964	1.19911	2.29598	0.00455967	0.0484137
F5	11.4145	0.53072	1.44465	3.0374e-06	0.000244227
FAM129A	24.2339	0.270579	1.20629	0.00384601	0.0431947
FAM129C	5.49097	0.263782	1.20062	0.00063677	0.0117867
FAM149A	0.257036	0.521456	1.4354	0.00478545	0.0501039
FAM189A2	0.0686747	0.986267	1.98105	0.00111922	0.017771
FAM196A	0.15179	0.562316	1.47664	4.96726e-05	0.00187704
FAM20A	1.68804	0.546932	1.46098	2.70713e-07	3.66033e-05
FAM20C	1.37788	0.397187	1.31694	0.00052224	0.0101669
FAM46A	9.14655	0.272893	1.20823	0.000111199	0.00343053
FAM53A	0.474365	0.597523	1.51312	9.21343e-05	0.00299169
FAM71F2	0.0589995	1.66768	3.17703	1.88528e-06	0.00016906
FAM89A	2.47654	0.483625	1.39825	8.49478e-06	0.000517673
FAR2	1.56517	0.349137	1.2738	0.000184576	0.00489946
FCER1G	87.1281	0.315075	1.24408	0.000134968	0.00391944
FCGR1A	0.618791	1.23499	2.35379	6.26639e-08	1.26107e-05
FCGRT	47.2109	0.391666	1.31191	1.90626e-05	0.000926733
FGA	0.0717032	3.31537	9.95465	0.000245343	0.0059974
FGB	0.0942416	1.79536	3.47101	0.00460211	0.0487028
FGD6	1.90024	0.461509	1.37698	0.000558754	0.0106384
FGF12	0.0238984	0.64006	1.55839	0.00374023	0.042531
FGFRL1	0.256182	0.42783	1.34521	0.00139159	0.0208521
FILIP1	0.0690573	0.823323	1.76948	0.000544891	0.0104779
FLOT2	5.21028	0.354879	1.27888	5.23575e-06	0.000363524
FMN1	0.0405625	0.601208	1.51699	2.08153e-05	0.000978941
FNDC3B	3.1414	0.261983	1.19913	0.00137345	0.0205982
FOSL2	16.7896	0.389319	1.30978	1.29491e-05	0.000687453
FOXQ1	0.166427	1.73807	3.33588	3.80308e-11	3.65666e-08
FOXRED1	6.97347	0.633716	1.55156	3.7563e-07	4.81557e-05
FRY	4.19502	0.285793	1.21908	1.14666e-05	0.000626032
FZD2	0.0521185	1.25284	2.3831	9.89253e-06	0.000577236
FZD4	0.903466	0.698295	1.62259	1.59447e-06	0.000148363
GADD45A	14.9804	0.577521	1.49228	6.05391e-07	7.27605e-05
GALC	2.87434	0.262776	1.19979	5.07384e-05	0.00190368
GAS2L1	2.14043	0.392988	1.31311	0.000931313	0.0153947
GATM	4.25586	0.869196	1.82664	4.2256e-12	1.04475e-08
GCH1	7.02451	0.587049	1.50217	1.35999e-09	6.36144e-07
GGT5	1.16075	0.417873	1.33596	0.000185484	0.00490998
GHSR	0.361034	0.539335	1.4533	7.24711e-05	0.00249852
GJA10	0.607347	0.620286	1.53718	1.20454e-07	2.1384e-05
GJB2	0.911537	0.56324	1.47758	2.09451e-05	0.000982297
GK	4.82928	0.50113	1.41532	5.93019e-06	0.000397806
GK5	1.37449	0.279028	1.21338	2.05732e-05	0.00097452
GLB1L	0.723143	0.269877	1.2057	0.00208321	0.0279923
GLIS3	0.288015	0.778222	1.71502	6.49133e-07	7.56724e-05
GLRX2	8.39602	0.421084	1.33893	6.9871e-07	7.85232e-05
GLT1D1	1.35265	0.706315	1.63163	9.65723e-05	0.00309514
GMNC	0.0148669	2.0864	4.24687	0.000557913	0.0106341
GMPR	2.6337	0.621189	1.53814	5.12268e-05	0.00191486
GNAQ	8.53343	0.293317	1.22545	6.82728e-05	0.00238225
GNG12	2.35977	0.415035	1.33333	0.00179999	0.0252989
GOLGA7B	0.562897	0.71989	1.64706	3.72406e-06	0.000284244
GOLM1	6.6721	0.353386	1.27756	0.000123041	0.00366517
GP5	0.438854	0.880231	1.84067	0.000863255	0.0145674
GP9	1.62639	0.716228	1.64288	0.000129049	0.00381136
GPBAR1	2.54852	0.641844	1.56032	2.93378e-06	0.000241653
GPR141	2.99418	0.407214	1.32612	0.000342142	0.00757219
GPR146	1.39749	0.374519	1.29641	6.43464e-05	0.00228206
GPR157	0.0456981	0.753991	1.68645	0.00345181	0.0401751
GPR158	0.070722	0.929068	1.90404	0.000133452	0.00390805
GPR27	1.57453	0.738725	1.6687	1.21086e-07	2.1384e-05
GPR84	1.78951	0.71766	1.64451	0.00146824	0.0216816
GPR87	0.887151	0.799468	1.74046	6.13232e-06	0.0004082
GPT2	8.34307	0.421592	1.33941	0.0011944	0.0186061
GRB10	0.42897	0.428282	1.34563	0.000994085	0.016185
GREB1	0.0537092	1.32844	2.51132	1.09904e-06	0.000115982
GUCY1A1	1.0161	0.60233	1.51817	1.96337e-05	0.000941273
HDAC4	1.40884	0.296889	1.22849	2.85209e-05	0.00124023
HEPACAM2	1.76425	0.680105	1.60226	0.000134973	0.00391944
HEXB	17.7354	0.265602	1.20214	4.6599e-05	0.00179619
HFE	1.1633	0.537868	1.45183	4.89018e-08	1.05793e-05
HGF	1.88875	0.411678	1.33023	1.505e-05	0.000761612
HILPDA	0.501886	1.04687	2.06604	3.34257e-08	7.61183e-06
HIP1	2.82153	0.365098	1.28797	1.8218e-05	0.000895734
HMOX1	23.692	0.417792	1.33588	0.000106972	0.00334784
HOMER3	4.21935	0.549931	1.46402	1.833e-05	0.000898687
HOXA6	0.012106	1.40043	2.6398	0.000140026	0.00401894
HOXA9	0.116724	1.15227	2.22263	5.47762e-05	0.00200425
HP	257.817	1.10852	2.15625	5.83796e-08	1.20283e-05
HS6ST1	5.6469	0.385522	1.30633	8.20859e-05	0.00275322
HSD3B7	1.98125	0.425995	1.3435	8.72149e-05	0.00288609
HSF4	1.37917	0.455872	1.37161	0.00121345	0.0188015
HSPA1A	53.1028	0.435006	1.35192	0.00166224	0.0238742
HSPA6	1.65679	1.29882	2.46027	8.6067e-06	0.000520826
HTR2A	0.11689	0.886865	1.84915	0.000107744	0.00335916
HTR7	0.417835	0.528326	1.44225	0.000689451	0.0124962
ID1	1.00451	1.00168	2.00233	3.8503e-06	0.000288473
IDH1	11.195	0.417899	1.33598	3.21861e-06	0.000255525
IDS	1.77367	0.270537	1.20626	0.00348177	0.0403881
IER3	3.88792	0.339459	1.26528	6.50412e-05	0.00230198
IER3IP1	25.6004	0.404463	1.3236	2.4806e-05	0.00110364
IFRD1	12.3685	0.368608	1.29111	2.09077e-07	3.15594e-05
IGF1	0.0522169	0.80042	1.74161	0.00192207	0.0263964
IGSF8	6.02036	0.35037	1.27489	7.23026e-05	0.00249769
IL12B	1.27234	0.773479	1.70939	1.49663e-06	0.000144316
IL15RA	2.21999	0.442667	1.35911	0.000182831	0.00486061
IL17RC	2.39991	0.462142	1.37759	5.13062e-06	0.000359496
IL18R1	1.96237	0.537772	1.45173	0.000276189	0.00651228
IL1RAP	2.65539	0.847092	1.79887	2.41469e-07	3.39764e-05
IL27	1.17399	0.458599	1.37421	0.000595921	0.0112104
IL2RA	11.0947	0.483175	1.39782	2.52181e-07	3.46388e-05
IL3RA	1.16428	0.624163	1.54132	0.00293754	0.0357136
INF2	4.05962	0.264989	1.20163	5.3823e-05	0.00197915
INSR	5.3197	0.305403	1.23576	6.17025e-06	0.000409152
IQSEC2	0.265825	0.417018	1.33516	0.000149779	0.00422875
ITGA2	1.01613	0.506434	1.42053	1.79229e-07	2.87215e-05
ITGA9	0.780618	0.530785	1.44472	0.00318856	0.0378494
ITGAX	37.4619	0.368392	1.29091	6.9646e-06	0.000448091
ITGB3	19.6637	0.366677	1.28938	0.00182868	0.0255853
ITIH1	0.0212738	2.37075	5.17211	0.00129161	0.0197997
ITSN1	3.05177	0.39683	1.31661	1.48507e-07	2.51981e-05
JAM3	2.75065	0.377313	1.29892	0.00131713	0.0200488
KAT2B	16.265	0.364812	1.28771	2.17712e-05	0.00100797
KATNAL2	0.0493416	0.973854	1.96408	0.00147771	0.0217843
KBTBD7	4.40862	0.468935	1.38409	2.12907e-05	0.000993204
KCNA6	0.047919	1.4204	2.6766	0.000812763	0.0140362
KCNK13	1.53194	0.33758	1.26364	0.000388485	0.0082295
KCNK17	1.58049	0.346866	1.2718	0.00328569	0.0387631
KCNT1	4.08031	0.462773	1.37819	4.09983e-05	0.00163117
KCTD14	0.327892	0.578034	1.49281	4.86109e-05	0.00185719
KDELR3	5.51984	0.302779	1.23352	4.50161e-05	0.00176316
KIAA0930	15.3664	0.265321	1.2019	7.08061e-06	0.000448879
KIRREL1	0.0459731	0.835796	1.78484	0.000171913	0.00468551
KLF10	15.1401	0.274626	1.20968	3.03462e-05	0.00130248
KLF11	6.13452	0.592285	1.50763	3.75552e-06	0.000285074
KLHL8	9.97018	0.423017	1.34073	2.24351e-05	0.0010245
KREMEN1	2.9208	1.12521	2.18133	4.18297e-09	1.54031e-06
KREMEN2	0.430808	0.756988	1.68996	1.94215e-06	0.000172373
KRT1	0.068602	3.22818	9.37083	0.000486339	0.00964449
LAMA5	0.117676	0.413034	1.33148	2.45695e-05	0.00109594
LAMC1	1.42612	0.301949	1.23281	5.74884e-05	0.00208585
LAMP1	105.482	0.322084	1.25014	1.8267e-06	0.000167274
LAP	0.263698	1.09757	2.13993	0.00219768	0.0290626
LDHA	104.806	0.308512	1.23843	1.97133e-05	0.000942479
LDLR	7.47429	0.436405	1.35323	2.11738e-08	5.81674e-06
LGALS3BP	26.11	0.3672	1.28985	1.47295e-07	2.51981e-05
LGALS9	63.2042	0.333558	1.26012	7.12299e-05	0.00246555
LGALSL	48.3582	0.389176	1.30964	0.0034135	0.0398902
LGMN	72.9368	0.294438	1.22641	9.22131e-06	0.000548521
LGR6	1.08952	0.687163	1.61011	1.54921e-06	0.000146902
LHFPL2	1.20569	0.813714	1.75773	1.51588e-08	4.52333e-06
LIMK2	3.49404	0.556758	1.47096	2.86592e-06	0.000238464
LIMS1	27.5535	0.331674	1.25847	0.000107854	0.00335916
LIPA	70.9	0.331527	1.25834	0.00057987	0.0109442
LMNA	2.11395	0.330986	1.25787	0.00387613	0.0434483
LOC100297334	0.0347111	3.18137	9.07165	0.000207201	0.00531262
LOC100298868	34.4355	0.38212	1.30326	0.000287473	0.00672338
LOC100336589	11.3153	0.588339	1.50351	0.000352827	0.00771006
LOC100337223	0.404929	2.55069	5.85914	2.98664e-05	0.00128902
LOC100852077	11.19	0.589664	1.5049	0.000164508	0.00449076
LOC101903647	0.0242602	1.08085	2.11528	7.06133e-05	0.00245403
LOC101904103	0.178984	0.571775	1.48635	0.00134301	0.0202694
LOC101904674	0.099972	2.48282	5.58991	0.00309554	0.0370502
LOC101905571	0.113408	0.739852	1.67	0.00406698	0.0450335
LOC101905813	0.0376877	1.66804	3.17783	0.000112239	0.00345031
LOC101907117	0.166107	0.645291	1.56405	6.62132e-05	0.00232917
LOC101907138	0.217425	3.07624	8.43412	5.14034e-05	0.00191554
LOC104971510	0.869827	0.372014	1.29416	0.00197728	0.0269032
LOC104973826	13.7339	0.347566	1.27241	0.000753356	0.0132773
LOC107131330	0.652213	1.35833	2.56388	5.71608e-10	3.29761e-07
LOC107131538	0.0396846	0.905433	1.87311	0.00215621	0.0287501
LOC107131803	7.40128	3.1437	8.8379	1.5872e-07	2.66696e-05
LOC107132672	0.0655679	0.83584	1.7849	0.00097247	0.0159229
LOC107132994	0.630826	0.388004	1.30858	0.00156534	0.0227467
LOC112442278	0.0541721	1.24761	2.37448	6.55044e-05	0.00231364
LOC112442367	0.021929	2.43185	5.39584	0.000945289	0.0156108
LOC112442414	11.2115	0.435563	1.35244	0.00166135	0.0238742
LOC112442952	0.19255	0.628621	1.54609	3.42901e-05	0.00144278
LOC112444532	0.503432	1.47268	2.77537	1.35027e-05	0.000710307
LOC112444598	0.927229	0.332019	1.25877	0.00281296	0.0346505
LOC112445470	1.92389	3.3287	10.0471	2.25217e-07	3.22809e-05
LOC112445945	0.133873	1.0371	2.0521	0.00040391	0.00851698
LOC112447831	0.113634	0.667518	1.58834	0.00348754	0.0404279
LOC112448535	0.67639	0.378862	1.30032	0.003715	0.0423275
LOC504861	7.43051	0.60538	1.52138	8.75314e-08	1.64664e-05
LOC505972	1.44646	1.87017	3.65577	6.92815e-10	3.74705e-07
LOC508459	19.7411	1.5219	2.8717	2.17582e-11	2.57956e-08
LOC511106	1.00093	3.17894	9.05643	1.4623e-06	0.00014218
LOC511695	0.945697	2.97697	7.87333	5.46547e-06	0.000369464
LOC514189	0.187302	0.458617	1.37422	0.000117094	0.00353646
LOC514978	1.72422	0.644196	1.56287	0.00031526	0.00715098
LOC515150	17.3032	0.496049	1.41035	0.00240479	0.030761
LOC515676	0.0815213	1.52484	2.87755	0.000628477	0.0116707
LOC518080	4.29561	0.321742	1.24984	0.00449882	0.0480236
LOC518911	0.203987	1.03538	2.04966	0.000103863	0.0032683
LOC519132	0.0663817	2.91862	7.56123	0.000141674	0.00403945
LOC521224	2.61202	0.417751	1.33584	0.00426489	0.0465694
LOC525820	2.40694	0.716054	1.64268	0.00222928	0.0292732
LOC530348	0.395962	0.61757	1.53429	1.04413e-05	0.000589652
LOC534742	12.3409	0.262853	1.19985	0.000142318	0.00405114
LOC536660	0.0058914	1.87639	3.67156	0.0014227	0.0211898
LOC538435	0.15635	1.22074	2.33066	0.000296819	0.00686771
LOC782922	0.528056	1.01228	2.01709	0.000626827	0.0116707
LOC783362	3.67827	1.10516	2.15123	1.88361e-06	0.00016906
LOC785216	1.42637	0.425547	1.34308	0.00216402	0.0287876
LOC786348	9.27766	2.74137	6.68704	1.28854e-06	0.000128907
LOC786942	5.44177	1.32707	2.50893	0.000125211	0.00371701
LOC787234	7.95918	0.457212	1.37289	1.55331e-06	0.000146902
LPAR1	0.313762	0.492925	1.4073	0.000627781	0.0116707
LPCAT2	24.4832	0.431319	1.34847	0.000568441	0.0107755
LRFN1	0.950762	0.38965	1.31008	0.000172568	0.00468816
LRP1	32.5971	0.514528	1.42853	3.72817e-06	0.000284244
LRP3	0.0482786	0.881746	1.8426	0.00165148	0.0237788
LRRC28	3.12906	0.350353	1.27487	3.47083e-05	0.0014442
LRRC36	0.321876	0.401956	1.3213	0.00209455	0.028101
LRRC46	0.052748	0.902855	1.86976	0.00333277	0.0392116
LSMEM1	0.623539	0.504344	1.41848	0.000415277	0.00864886
LTBR	8.68226	0.389518	1.30996	7.02843e-06	0.000448779
LUZP1	0.938502	0.380529	1.30182	6.78117e-07	7.7045e-05
LYPD5	0.111549	0.928935	1.90387	0.000492684	0.00973389
MAFB	13.7072	0.520653	1.4346	3.04807e-06	0.000244227
MAFG	5.35016	0.335281	1.26162	1.68152e-07	2.77163e-05
MAK	0.148416	0.47181	1.38685	0.000294653	0.00683587
MANF	29.1419	0.301407	1.23235	0.00272725	0.0338597
MANSC1	3.94048	0.587638	1.50278	1.41473e-05	0.000732789
MAOA	17.7391	0.336318	1.26253	0.000321077	0.00725441
MAP1B	0.0671885	0.604118	1.52005	0.00284883	0.0349986
MAP2	3.8288	0.602296	1.51813	1.82317e-07	2.89482e-05
MAP3K6	0.859729	0.348719	1.27343	0.00479432	0.0501362
MAPK13	3.46443	0.811121	1.75457	4.04466e-07	5.14712e-05
MAPK6	18.2909	0.262969	1.19995	5.07846e-06	0.000358746
MAPRE2	16.7796	0.401138	1.32055	1.37059e-05	0.000718812
MARCO	0.0867871	2.7812	6.87423	1.04256e-05	0.000589652
MCTP1	4.23775	0.273351	1.20861	0.00136436	0.0204859
MCU	7.32937	0.326489	1.25396	3.1482e-06	0.000251087
ME1	0.272782	1.09513	2.13632	5.77764e-07	6.99256e-05
MEGF9	7.01635	0.751276	1.68328	4.46066e-05	0.00175456
MEIS1	1.16397	0.712223	1.63833	1.16409e-08	3.59765e-06
MERTK	2.1477	0.805726	1.74803	2.64812e-10	1.90963e-07
MFGE8	2.10846	0.260814	1.19815	0.00111135	0.0176784
MGAM	3.973	0.936189	1.91347	4.71074e-06	0.000336896
MGST1	17.3857	0.46928	1.38442	4.23371e-06	0.000307869
MINDY1	4.34268	0.452578	1.36848	3.81633e-06	0.00028717
MINDY3	97.7307	0.432432	1.34951	0.000461438	0.00930781
MINDY4	0.26982	0.4803	1.39503	0.000506734	0.00993602
MITF	10.6349	0.360246	1.28364	0.000332335	0.00745888
MMP9	4.76752	1.43443	2.70276	1.20354e-06	0.000123252
MN1	0.356863	0.981505	1.97452	3.24431e-11	3.50933e-08
MOB1B	3.21372	0.41493	1.33323	8.76558e-06	0.000528592
MOCOS	4.81791	0.493342	1.4077	1.457e-05	0.000743737
MPDZ	0.0571708	0.607329	1.52344	0.000557345	0.0106341
MPP7	5.22412	0.317254	1.24596	0.00375438	0.0426079
MPV17L	0.38789	0.777342	1.71397	7.00845e-06	0.000448779
MRVI1	0.28574	0.635436	1.55341	0.000486488	0.00964449
MSRB1	44.6982	0.327808	1.25511	9.09497e-05	0.0029746
MSRB3	1.28275	0.350902	1.27536	0.00042524	0.00880339
MTCL1	0.600503	0.310109	1.2398	0.000890626	0.0148784
MTMR7	1.04582	0.341111	1.26673	0.00146296	0.0216405
MTURN	11.4796	0.357102	1.28085	4.77246e-06	0.000339905
MVP	51.1278	0.32201	1.25007	4.04569e-06	0.000297952
MYBL1	3.33095	0.319564	1.24795	0.00120209	0.0186756
MYBPH	5.11438	0.581723	1.49664	0.000130628	0.00384021
MYH2	0.0383478	2.76943	6.81837	0.00063195	0.0117156
MYLK	1.47907	0.463988	1.37935	0.00226239	0.0294774
MYO19	0.725286	0.320973	1.24917	0.000537309	0.0103902
MYO6	0.209	0.73203	1.66097	2.06564e-05	0.00097452
MYRFL	0.0592896	2.28649	4.87869	2.30295e-09	9.72125e-07
NACC2	2.8229	0.33738	1.26346	0.000628059	0.0116707
NAPRT	4.5564	0.580875	1.49576	1.31009e-08	3.97783e-06
NBDY	1.51622	0.303155	1.23384	0.000180757	0.00483853
NCF4	35.5561	0.286273	1.21949	6.33065e-05	0.00224979
NCLN	11.3111	0.293601	1.2257	4.13747e-06	0.00030214
NEDD4	3.46005	0.275808	1.21067	0.00179009	0.0252084
NELL2	3.6149	0.410977	1.32959	0.00281555	0.0346577
NF1	5.6092	0.319126	1.24757	5.48635e-06	0.000369464
NFAM1	19.9708	0.27669	1.21141	0.00327148	0.0386482
NFIA	0.355528	0.421938	1.33973	2.01082e-06	0.000176656
NFIL3	21.2585	0.610539	1.52683	3.30892e-06	0.000259931
NHSL2	6.58498	0.318124	1.24671	8.0075e-05	0.00270675
NINJ2	0.125854	1.1032	2.1483	0.000341425	0.00756599
NLRC4	13.4849	0.371573	1.29376	0.000136737	0.0039515
NLRX1	4.35237	0.313773	1.24295	2.42135e-05	0.00108565
NMUR2	0.118947	0.858727	1.81344	0.00391116	0.0437277
NNAT	0.972703	0.358458	1.28205	0.00296856	0.0360034
NOD2	5.55098	0.409816	1.32852	1.01797e-06	0.000108753
NOL3	0.51979	0.717065	1.64383	1.41841e-05	0.000732789
NOTCH3	0.979412	0.510636	1.42468	0.000520202	0.0101387
NOV	0.0709977	2.16523	4.48539	0.00134333	0.0202694
NRG1	2.29561	1.02158	2.03014	2.45788e-12	8.50771e-09
NRP1	15.2713	0.440236	1.35683	0.000492345	0.00973389
NRP2	5.13885	0.489076	1.40355	5.51352e-07	6.76614e-05
NT5DC2	1.90994	0.341985	1.2675	0.00375908	0.0426253
NUDT7	15.6155	0.285064	1.21846	0.000970261	0.0159018
NUPR1	17.0169	0.979414	1.97166	1.17072e-07	2.13281e-05
OAF	0.732446	0.32998	1.257	0.0034936	0.040471
OAS1Z	14.9186	0.585054	1.5001	0.00324703	0.038438
OCRL	1.89209	0.263688	1.20054	9.68106e-05	0.00309704
OGFRL1	19.5309	0.285336	1.21869	0.00267625	0.0333223
OLFM4	1.65784	0.850529	1.80316	0.000195391	0.00507402
OMG	2.21334	0.363425	1.28648	0.000572131	0.0108336
ONECUT2	0.00714344	1.11201	2.16147	0.00403325	0.0447172
OPHN1	1.05884	0.365031	1.28791	1.84951e-05	0.000904221
OSGIN1	0.37131	0.928542	1.90335	4.73821e-07	5.89959e-05
P2RX1	0.791947	0.656136	1.57586	0.000102204	0.00322783
P2RY1	11.8508	0.3569	1.28067	0.000474996	0.00949259
P2RY2	0.214979	0.435049	1.35196	0.000260666	0.00625706
P4HA1	8.62682	0.259047	1.19669	4.79469e-05	0.00183995
PALM3	0.39973	0.492906	1.40728	0.000216478	0.00544563
PAM	37.0957	0.439099	1.35576	3.03111e-06	0.000244227
PAMR1	0.324965	1.91766	3.7781	2.8619e-10	1.98124e-07
PARD3	0.452442	0.864489	1.8207	2.34375e-06	0.000200808
PARP3	2.26783	0.531524	1.44546	1.69017e-06	0.000155594
PARVB	7.82405	0.627973	1.54539	0.000140308	0.00401956
PAX8	0.718795	0.57818	1.49296	1.54392e-06	0.000146902
PC	0.375381	0.325861	1.25341	0.00356759	0.0411629
PCDH9	0.196702	0.687512	1.6105	1.97803e-08	5.61208e-06
PCDHGA2	0.232096	0.40335	1.32258	0.000477042	0.00951171
PCDHGC3	0.0927699	0.83918	1.78903	0.000199014	0.00514079
PCNX2	0.0883925	0.517032	1.43101	0.00377021	0.0426477
PDE3A	2.13615	0.653382	1.57285	1.05547e-07	1.94329e-05
PDE6A	0.0483935	0.687926	1.61097	0.0008419	0.0143696
PDK4	29.1929	1.07025	2.09979	1.01515e-11	1.72828e-08
PDLIM1	35.1652	0.56175	1.47606	3.1999e-05	0.0013607
PDXK	13.3427	0.565963	1.48038	2.59815e-08	6.61366e-06
PDZD3	0.388463	0.48659	1.40113	0.00213129	0.0284862
PELI2	3.0619	0.291918	1.22427	0.00078045	0.0136654
PFKFB4	16.2856	0.545777	1.45981	1.91136e-09	8.48203e-07
PGD	60.595	0.261311	1.19857	0.000451203	0.00916545
PHETA1	0.319864	0.356924	1.28069	0.00439552	0.0471918
PHLDB3	0.862492	0.349349	1.27399	0.00425766	0.0465492
PIK3C2A	10.0377	0.359823	1.28327	1.13458e-09	5.94155e-07
PILRA	27.3285	0.418993	1.33699	3.37923e-05	0.00142645
PKD2	0.305428	0.530981	1.44491	1.43917e-05	0.000741301
PKHD1L1	0.230382	0.575286	1.48997	0.000290988	0.00678676
PKM	176.763	0.338165	1.26415	1.6892e-06	0.000155594
PLA2G4A	6.14019	0.304283	1.23481	0.00480558	0.0502235
PLA2G4B	0.663442	0.389852	1.31026	0.000256034	0.00618016
PLA2G4F	0.224177	1.27737	2.42397	8.6673e-09	2.83028e-06
PLBD1	79.1457	0.303027	1.23373	0.00230731	0.0298673
PLCB1	0.354494	0.506119	1.42022	0.000462167	0.00931168
PLCD1	3.49958	0.409884	1.32858	5.44551e-05	0.00199672
PLD2	0.733982	0.265607	1.20214	0.00458484	0.0485617
PLEKHA5	1.5183	0.351028	1.27547	0.000153716	0.00428611
PLIN3	3.70513	0.396588	1.31639	8.40269e-05	0.00281287
PLN	0.567276	0.515092	1.42909	0.000262455	0.00627223
PLOD1	7.13218	0.329425	1.25651	4.57007e-05	0.00177341
PNMA8A	0.102639	1.13219	2.19191	3.62817e-05	0.00149507
PNPT1	9.20498	0.312668	1.242	1.93309e-05	0.000937141
PPARD	1.8764	0.403393	1.32261	1.02974e-05	0.000589652
PPFIA4	0.109557	0.497692	1.41195	4.50289e-05	0.00176316
PPP1R26	0.504331	0.260282	1.19771	0.0038112	0.0428872
PRDX5	54.8924	0.379463	1.30086	3.90249e-06	0.000291123
PRG4	0.0910596	0.438131	1.35485	0.00289708	0.0354255
PRKG1	0.791995	0.481793	1.39648	0.000195256	0.00507402
PRODH	13.5114	0.34168	1.26723	0.000747342	0.0132387
PROK2	3.54084	1.59509	3.02114	5.2459e-12	1.13489e-08
PTGIR	0.0567851	0.901273	1.86771	0.000121821	0.00363509
PTGS1	0.27225	0.676737	1.59852	5.38903e-06	0.000365757
PTPN12	13.9916	0.257878	1.19572	8.10237e-06	0.000497261
PTPN14	0.236004	0.498843	1.41308	0.000824145	0.0141626
PTPN5	1.08581	0.918806	1.89055	2.02713e-05	0.000963833
PTPRG	0.317649	0.867683	1.82473	1.74401e-08	5.11585e-06
PTPRK	0.141941	0.63142	1.54909	0.00180091	0.0252989
PTX3	20.6968	4.85136	28.8672	2.91468e-23	5.04443e-19
PWWP2B_2	0.882086	0.3681	1.29065	0.00162547	0.0234824
PYCARD	36.6017	0.322754	1.25072	0.000382451	0.00813156
PYCR1	0.996874	0.673501	1.59494	7.76844e-06	0.00048241
PYY	0.274048	0.691453	1.61491	0.00169841	0.0241848
QPRT	0.0950744	0.784994	1.72309	0.00334752	0.0392783
RAB20	3.74518	1.32441	2.5043	4.32193e-11	3.93682e-08
RAB27B	12.4804	0.310419	1.24007	0.00166774	0.0239333
RAB31	50.4536	0.308679	1.23857	0.00291589	0.035564
RAB3D	10.8042	0.608562	1.52474	1.24622e-06	0.000125397
RAB3IP	7.11521	1.08469	2.12092	3.12591e-08	7.4008e-06
RAB4A	3.17661	0.292625	1.22487	7.56756e-05	0.00259864
RAB5IF	25.5208	0.25878	1.19647	0.000367108	0.0079024
RAB7B	3.15211	0.443755	1.36014	8.53116e-05	0.00284487
RAMP3	0.474305	0.788446	1.72721	0.000143906	0.00408963
RASSF6	0.302512	0.77851	1.71536	5.36537e-06	0.000365757
RBKS	3.5215	0.391658	1.3119	0.000151929	0.00424787
RBPMS	1.99199	0.497301	1.41157	1.56882e-06	0.000147563
RBPMS2	0.375914	0.491994	1.40639	0.000228082	0.00567157
RELT	4.82721	0.276812	1.21152	0.00236988	0.0303909
RET	0.836096	0.414482	1.33282	0.000572879	0.0108359
RGL1	0.136977	0.684524	1.60717	0.000193776	0.00506598
RGS10	27.1338	0.257696	1.19557	8.75505e-05	0.00289167
RGS18	22.8041	0.51673	1.43071	2.22531e-07	3.22809e-05
RHOBTB1	1.11419	0.607758	1.52389	9.18884e-06	0.000548521
RIDA	133.658	0.360078	1.2835	1.31336e-05	0.000692997
RIMBP3B	0.187343	0.541017	1.455	0.000150496	0.00423649
RIMS1	0.00530482	1.72992	3.31709	0.00432808	0.0467828
RIPOR1	0.891877	0.266031	1.20249	0.00185157	0.025769
RIPOR3	0.637999	0.731554	1.66043	6.40789e-08	1.27473e-05
RNASE10	0.273259	0.884207	1.84575	4.81968e-08	1.05588e-05
RNASE4	56.4176	0.527823	1.44175	2.18496e-07	3.22809e-05
RNASE6	235.564	0.298182	1.22959	0.00213397	0.0284975
RNF133	0.0555404	0.67857	1.60055	0.000335176	0.00750439
RNF217	1.5071	0.335199	1.26155	0.000119487	0.003584
ROR2	0.190782	0.669395	1.59041	0.000263984	0.00628443
RPA4	0.565822	0.396684	1.31648	0.000857971	0.0145335
RRBP1	17.8297	0.315313	1.24428	4.25582e-05	0.00168548
RYR1	0.237395	0.776799	1.71333	1.98451e-05	0.000946166
S100A11	89.4165	0.260858	1.19819	0.00293847	0.0357136
S100A12	1176.34	0.646496	1.56536	2.47262e-06	0.000207736
S100A8	778.678	0.775397	1.71166	1.47785e-07	2.51981e-05
S100A9	727.265	0.947612	1.92868	2.47624e-08	6.49337e-06
SAMD4A	0.568734	0.501245	1.41543	9.56741e-08	1.78046e-05
SAP30	10.2074	0.324654	1.25236	9.91191e-06	0.000577236
SASH1	0.139801	0.445441	1.36173	0.000495845	0.00978517
SATB2	0.0139101	0.857131	1.81143	0.00429354	0.0467054
SBNO2	12.6199	0.378573	1.30006	0.000181455	0.00484635
SCARB1	11.9034	0.532383	1.44632	2.59854e-08	6.61366e-06
SCARB2	14.1397	0.325173	1.25281	0.000406328	0.00853437
SCARF1	3.59164	0.548798	1.46287	1.71526e-07	2.80057e-05
SCFD2	7.15218	0.322768	1.25073	6.64989e-08	1.30784e-05
SCN9A	0.112363	0.527688	1.44162	0.00454681	0.0483364
SCPEP1	56.7275	0.314508	1.24359	1.75806e-05	0.000866859
SDC4	1.25606	0.370287	1.29261	0.000707544	0.0127292
SELENON	3.16058	0.506866	1.42096	1.22777e-07	2.14636e-05
SELENOP	4.94066	0.450102	1.36614	1.39514e-05	0.000729478
SELP	6.97534	0.439374	1.35602	0.00313894	0.0373886
SEMA3C	5.29993	0.807829	1.75058	2.23571e-11	2.57956e-08
SEMA4D	31.7408	0.257572	1.19547	3.93334e-05	0.00159424
SEPT5	5.65508	0.707649	1.63314	2.99949e-06	0.000243719
SERINC2	12.2954	0.493196	1.40756	0.000266317	0.00633125
SERPINA1	0.0477747	2.34857	5.09321	0.00312622	0.0373141
SERPINA3-1	0.0314025	2.74077	6.68427	0.00342531	0.0399474
SERPINB4	6.5718	3.01316	8.07329	2.44856e-08	6.49337e-06
SESN2	1.88216	0.290857	1.22337	0.000249433	0.00606597
SESTD1	0.44694	0.811633	1.7552	1.8359e-08	5.29565e-06
SETD1B	2.76929	0.262833	1.19983	0.00218879	0.0289835
SH2D1B	13.2364	0.394487	1.31448	0.000150787	0.00423649
SH3BGRL	62.5919	0.348949	1.27363	0.000474001	0.00949259
SH3BP4	0.455862	0.408261	1.32709	0.000257226	0.00619168
SH3D19	0.35946	0.431155	1.34831	0.000145526	0.0041289
SH3GL2	0.0934949	1.00691	2.0096	0.000308503	0.00704388
SH3GL3	0.630777	0.74409	1.67492	0.00480908	0.0502297
SH3PXD2A	0.553084	0.568189	1.48266	5.20407e-08	1.09838e-05
SH3PXD2B	0.932294	0.809429	1.75252	3.42569e-08	7.69979e-06
SH3RF1	0.476858	0.544653	1.45867	1.85915e-06	0.000168463
SHISA5	21.3884	0.322975	1.25091	2.1902e-05	0.00101082
SHISAL1	0.0822688	0.891502	1.85511	0.00233347	0.030112
SHROOM4	0.336628	1.7162	3.2857	6.04617e-10	3.37552e-07
SIGLEC8	6.93778	0.414173	1.33253	0.00424667	0.0464878
SKAP2	23.7077	0.356499	1.28032	1.19118e-05	0.00064424
SLC11A1	58.7604	0.731966	1.6609	4.5596e-11	3.94565e-08
SLC12A7	11.0683	0.321314	1.24947	0.000715584	0.0128338
SLC13A3	4.77186	0.841521	1.79194	2.29265e-09	9.72125e-07
SLC16A5	2.55888	0.287564	1.22058	0.00288183	0.0353228
SLC16A7	0.129997	0.852292	1.80537	0.000300754	0.0069134
SLC1A5	10.4867	0.668945	1.58991	1.1704e-09	5.94155e-07
SLC25A20	19.8105	0.262362	1.19944	0.000154004	0.00428611
SLC26A6	7.77614	0.44023	1.35682	2.91058e-09	1.14485e-06
SLC26A8	0.286948	1.30281	2.4671	1.50803e-09	6.86828e-07
SLC28A3	6.82296	0.896617	1.86169	4.02497e-05	0.00161891
SLC2A3	76.1374	0.303752	1.23435	0.00143091	0.0212755
SLC2A9	12.2326	0.539192	1.45316	1.9189e-07	2.99193e-05
SLC31A2	7.51463	0.286942	1.22005	0.0008075	0.0139754
SLC38A6	2.07877	0.28501	1.21842	9.90304e-05	0.00316221
SLC39A8	0.571349	0.841415	1.79181	8.94904e-07	9.8227e-05
SLC5A6	3.25723	0.273028	1.20834	5.15677e-06	0.000359872
SLC6A2	0.208172	0.97554	1.96638	6.64579e-05	0.00233304
SLC6A20	0.416995	0.31252	1.24187	0.00131263	0.0199979
SLC6A4	9.27184	0.977288	1.96876	1.53686e-10	1.23096e-07
SLC7A10	0.380236	0.747117	1.67844	0.000133917	0.00391505
SLC9A9	8.20064	0.357967	1.28162	8.6389e-08	1.643e-05
SLCO4A1	2.66801	0.761212	1.69491	3.4346e-05	0.00144278
SLCO4C1	2.73647	0.570117	1.48464	2.13553e-05	0.00099354
SLFN14	3.98427	0.59596	1.51148	3.35021e-07	4.39258e-05
SNTA1	0.703423	0.774551	1.71066	3.45837e-06	0.000269613
SNTB2	2.11402	0.257311	1.19525	0.000788556	0.0137438
SNX24	3.87977	0.547381	1.46143	4.3908e-06	0.000315318
SOCS3	30.8402	0.477101	1.39194	0.00081714	0.0140719
SOCS6	1.51114	0.473478	1.38845	1.21854e-05	0.000654945
SOD2	113.795	0.538331	1.45229	0.000189237	0.00497464
SORT1	4.95919	0.898151	1.86368	2.58791e-10	1.90963e-07
SPAG1	0.760999	0.301509	1.23243	0.00263597	0.0329318
SPAG17	0.0069166	1.1895	2.28073	0.0012978	0.019877
SPATA6	3.92347	0.390949	1.31126	5.35863e-05	0.00197744
SPECC1	3.11953	0.319782	1.24814	9.9315e-06	0.000577236
SPHK1	5.9142	0.334175	1.26066	5.08176e-05	0.00190368
SPRED1	0.93515	0.360261	1.28366	9.63577e-05	0.00309399
SPSB2	3.30831	0.289939	1.22259	0.000277972	0.0065454
STARD13	0.934057	0.355897	1.27978	6.11203e-05	0.00218556
STBD1	0.0794349	1.40745	2.65268	3.45599e-05	0.0014442
STEAP1	0.129902	2.33315	5.03903	4.33739e-06	0.000314088
STEAP2	2.43226	0.394512	1.3145	0.00135475	0.0203833
STEAP3	4.01848	0.337983	1.26399	0.000214649	0.00542413
STK3	4.81923	0.269806	1.20565	0.00042496	0.00880339
STOM	39.7245	0.402499	1.3218	7.73104e-06	0.00048241
STRIP2	3.92384	0.336209	1.26243	0.00450887	0.0480753
STX11	8.9456	0.581509	1.49641	2.69785e-09	1.11171e-06
STX2	16.1072	0.31182	1.24127	7.01751e-05	0.0024437
STXBP1	0.0231223	1.40207	2.64281	0.00034083	0.00756599
SULF1	0.0191521	1.32109	2.49855	0.00419293	0.0460451
SULT1A1	92.4811	0.535955	1.4499	9.80419e-06	0.000577236
SV2C	0.138606	1.70263	3.25495	7.07716e-05	0.0024546
SYDE2	0.33596	0.484933	1.39952	0.00331187	0.0390187
SYNPO2	1.75087	0.596917	1.51248	1.039e-05	0.000589652
SYT4	1.20829	0.711787	1.63783	3.24818e-05	0.00137785
TAL1	8.76195	0.344065	1.26933	0.000110568	0.00342556
TALDO1	160.141	0.351628	1.276	3.81055e-06	0.00028717
TARS	119.983	0.301612	1.23252	0.00109358	0.01746
TBC1D8B	0.989138	0.362742	1.28587	6.7395e-05	0.00235637
TBC1D9	7.85727	0.260886	1.19821	0.00202356	0.0273608
TBX18	0.0320779	1.86796	3.65015	0.000175968	0.00475857
TBXAS1	12.7915	0.448921	1.36502	5.35694e-06	0.000365757
TCHHL1	0.0257962	1.25838	2.39228	0.000374307	0.0080175
TCN1	44.3583	0.989963	1.98613	1.08551e-05	0.000607991
TDRD1	0.0441418	1.22275	2.33392	0.000139545	0.0040118
TEX2	4.79374	0.272523	1.20792	7.48288e-07	8.30167e-05
TF	0.0724672	3.1734	9.02171	0.000338104	0.0075504
TFEC	13.8812	0.402754	1.32203	9.97246e-06	0.000577236
TFPI	0.142866	0.593375	1.50877	0.00237059	0.0303909
TGM3	61.0796	0.749482	1.68119	0.000357514	0.0077928
THBD	4.6002	0.308083	1.23806	0.00302998	0.0364927
THRB	0.944407	0.527151	1.44108	0.00102193	0.0165449
THY1	0.726066	1.82032	3.53159	3.44913e-07	4.48828e-05
TIAM2	2.07121	0.783187	1.72093	1.66135e-05	0.000828615
TIMP1	17.0066	0.321934	1.25001	0.000381159	0.00811661
TIMP2	34.6488	0.283307	1.21698	0.00213148	0.0284862
TIRAP	2.45991	0.362772	1.28589	3.77026e-08	8.36563e-06
TLCD2	0.0253087	0.780066	1.71721	0.00325575	0.0385149
TLR4	20.3066	0.261555	1.19877	0.00367988	0.0420658
TMBIM1	19.2218	0.260746	1.1981	0.00145806	0.0215866
TMCC1	4.17835	0.380522	1.30181	1.56476e-10	1.23096e-07
TMEM104	1.1203	0.320842	1.24906	2.90778e-05	0.00125812
TMEM120A	5.65295	0.385695	1.30649	3.84071e-05	0.0015639
TMEM150B	2.50268	0.509978	1.42403	1.144e-05	0.000626032
TMEM159	3.10281	0.377659	1.29923	0.00355933	0.0411345
TMEM170B	3.72985	0.305717	1.23603	4.51832e-05	0.00176521
TMEM184B	6.42074	0.275031	1.21002	0.000114248	0.00349962
TMEM53	0.818612	0.34176	1.2673	0.00239738	0.030689
TMTC2	1.09946	0.88762	1.85012	4.03173e-10	2.53781e-07
TNFAIP6	3.73196	1.76183	3.39127	1.22054e-09	5.94155e-07
TNFAIP8L3	0.180442	0.811921	1.75555	9.16418e-05	0.00298129
TNFRSF1A	37.5322	0.309118	1.23895	5.69005e-05	0.00206886
TNFRSF1B	107.117	0.260262	1.1977	0.000863588	0.0145674
TNFSF13	12.3954	0.357831	1.2815	0.000365092	0.00786881
TNFSF13B	4.96475	0.427727	1.34511	5.14661e-05	0.00191554
TNIP2	3.49614	0.265057	1.20168	0.000540659	0.0104316
TNRC18	3.69314	0.275495	1.21041	0.000928103	0.0153563
TNS3	18.497	0.359002	1.28254	1.85622e-06	0.000168463
TOM1L1	4.23109	0.401269	1.32067	0.000306646	0.00701073
TP53BP2	0.1804	0.379053	1.30049	0.00201214	0.0272489
TPM1	8.51483	0.445093	1.3614	0.00335634	0.0393285
TPM4	28.9049	0.288111	1.22104	2.87527e-05	0.00124718
TPP1	3.63152	0.313229	1.24249	0.000474952	0.00949259
TRAM2	2.10093	0.438884	1.35556	4.97904e-05	0.00187739
TREM1	39.736	0.733043	1.66214	2.38362e-08	6.44582e-06
TRIM47	2.46878	0.466763	1.38201	0.00140945	0.0210469
TRIP10	0.609568	0.457931	1.37357	0.000285256	0.00668056
TRPC5	0.421303	0.935571	1.91265	3.13445e-05	0.00133945
TRPM6	4.79277	0.494976	1.4093	2.19964e-05	0.00101248
TSKS	0.0241246	1.2964	2.45616	0.00271597	0.0337682
TSLP	0.151885	1.21804	2.3263	0.000151287	0.00424363
TSPAN32	3.96432	0.412439	1.33093	1.95221e-06	0.000172382
TSPO	193.874	0.279713	1.21395	0.00149209	0.0219402
TTC21B	13.3714	0.300777	1.23181	0.000240867	0.00591302
TTLL7	1.52841	0.351493	1.27588	0.000566793	0.010756
TTYH3	6.13803	0.52894	1.44287	2.51541e-06	0.00021031
TWIST1	0.199607	0.628299	1.54574	0.00453632	0.0482545
TXNDC16	1.4732	0.390888	1.3112	0.000639917	0.0118197
TXNDC2	0.141501	0.587974	1.50313	0.00378598	0.0427981
UBTD1	7.71483	0.353284	1.27747	0.000181988	0.00484964
ULK1	4.52362	0.297661	1.22915	0.000267913	0.00635174
UPB1	0.461501	0.490564	1.40499	0.000119224	0.003584
UPP1	8.74753	0.962751	1.94902	5.13479e-07	6.3477e-05
UST	6.36107	0.270461	1.20619	2.80562e-05	0.00122309
VASN	0.639197	0.352588	1.27685	0.00379922	0.042847
VCAN	54.5226	0.579253	1.49408	4.08356e-06	0.000299467
VDR	0.958987	0.322113	1.25016	0.000979625	0.0160249
VLDLR	5.26588	0.680749	1.60297	2.96579e-08	7.28754e-06
VWF	4.21377	1.07031	2.09988	5.55147e-07	6.76614e-05
WDFY3	8.86109	0.405041	1.32413	0.000598886	0.0112296
WFDC3	0.162924	0.753946	1.6864	0.00399788	0.0443869
WIPI1	2.39251	0.622624	1.53967	4.38561e-06	0.000315318
WLS	56.8994	0.552152	1.46627	9.11282e-06	0.000547624
WWC3	1.69985	0.393578	1.31365	9.58454e-07	0.000103675
XG	19.7995	0.273758	1.20895	0.000209194	0.0053479
XYLB	0.535704	0.316082	1.24494	0.000996699	0.0161971
ZCCHC14	1.92384	0.568579	1.48306	1.37919e-16	7.95655e-13
ZDHHC2	7.32282	0.660137	1.58023	2.46119e-07	3.43515e-05
ZFAND2A	0.649215	0.512205	1.42623	1.94613e-05	0.000938207
ZFHX3	0.344045	0.464543	1.37988	0.000133401	0.00390805
ZFYVE9	3.66615	0.262604	1.19964	1.24261e-06	0.000125397
ZMAT4	0.0120922	1.77528	3.42305	0.002102	0.0281792
ZNF282	1.20055	0.303863	1.23445	0.000694917	0.0125673
ZNF484	3.64831	0.327016	1.25442	0.00088958	0.0148784
ZNF618	1.24331	0.270702	1.20639	0.0021594	0.0287536
ZNF697	0.501659	0.416269	1.33447	0.000101064	0.00321271
ZNF821	2.36498	0.591954	1.50729	2.15775e-07	3.21933e-05
ZSCAN30	0.279638	0.295874	1.22763	0.00159881	0.0231553
ZSWIM6	3.86801	0.352507	1.27678	3.16438e-08	7.4008e-06

## Sheet: Table S2
Table S2. List of DEG with FC≥1.2 and FDR P <0.05 with lower expression in cows
with LOW IGF1 (<35 ng/ml, n = 35) in comparison with HIGH IGF1 (>100 ng/ml, n = 43) in leucocytes
of cows at 14 days in milk, based on the global transcriptome.
Gene symbol	Max group mean (RPKM)	Log₂ fold change	Fold change	P-value	FDR p-value
A4GALT	2.79909	-0.284772	-1.21822	0.00216947	0.0288371
AARSD1	6.05399	-0.261537	-1.19876	0.00418258	0.0459898
ABCG1	1.82996	-0.392182	-1.31238	9.26801e-05	0.00299816
ABRAXAS1	6.04618	-0.279155	-1.21348	2.06383e-06	0.000179491
ADCY8	0.209197	-0.576459	-1.49118	0.000557235	0.0106341
ADGRB2	0.123433	-1.12294	-2.1779	1.50094e-06	0.000144316
ADRA2A	11.8766	-0.418193	-1.33625	7.67175e-05	0.00262401
AFAP1L1	0.997019	-0.482632	-1.39729	4.90076e-06	0.000347613
AGFG2	6.66083	-0.300198	-1.23131	5.12596e-06	0.000359496
AICDA	0.0654257	-1.12119	-2.17526	0.00192719	0.0264085
ALAD	3.15375	-0.420938	-1.3388	0.000864773	0.0145731
ALAS2	30.9934	-1.60213	-3.0359	4.04501e-06	0.000297952
ANKRD34A	0.602084	-0.387014	-1.30768	0.0020776	0.0279604
ANO2	0.0102123	-1.24452	-2.36939	0.00456337	0.0484232
APLP1	0.131539	-0.634129	-1.552	0.00304642	0.0366142
ARPC5L	43.239	-0.293586	-1.22568	3.32075e-07	4.38719e-05
ATP12A	0.38019	-0.728805	-1.65727	0.00038128	0.00811661
B3GALT2	3.93222	-0.322973	-1.25091	0.000616849	0.0115165
B4GALT6	5.28412	-0.33411	-1.2606	0.00299591	0.0362589
BANK1	51.9027	-0.326254	-1.25375	7.91784e-05	0.00268168
BATF	12.6331	-0.37886	-1.30031	1.32759e-06	0.000131224
BCAR3	0.875133	-0.352773	-1.27701	0.000239884	0.00591223
BCAT2	1.69576	-0.4076	-1.32648	4.52453e-07	5.67434e-05
BHLHE41	5.95694	-0.366307	-1.28905	9.93949e-06	0.000577236
BLA-DQB	656.245	-0.257685	-1.19556	0.000812324	0.0140362
BLK	5.31644	-0.405194	-1.32427	1.30894e-05	0.000692779
BOLA-DOA	23.0611	-0.327883	-1.25517	7.97607e-06	0.000491252
BOLA-DRB2	22.0697	-0.560357	-1.47463	0.00209014	0.0280637
C10H15orf59	0.745546	-0.802056	-1.74358	0.0026233	0.0328996
C14H8orf88	0.013585	-1.65444	-3.14802	0.00220814	0.0291505
C18H16orf74	6.10163	-0.318012	-1.24661	1.75578e-05	0.000866859
C1QTNF12	1.06335	-0.510471	-1.42452	0.000339876	0.00756072
C28H10orf105	1.25506	-0.333214	-1.25982	0.00470906	0.0496345
CCR4	6.06774	-0.282947	-1.21668	0.0028432	0.0349731
CD163L1	2.76484	-0.600929	-1.51669	0.000187795	0.00494698
CD19	13.7293	-0.266936	-1.20325	0.000501266	0.00986379
CD1B	0.219662	-0.863463	-1.8194	0.000463671	0.00933112
CD1E	2.35934	-0.571689	-1.48626	0.000892583	0.0148968
CD276	0.155949	-0.577994	-1.49277	0.00067265	0.0122672
CD52	344.005	-0.282139	-1.216	6.5412e-07	7.56724e-05
CD79B	45.3384	-0.3447	-1.26989	0.00038735	0.00821552
CECR2	0.236395	-0.597907	-1.51352	0.00014759	0.00417633
CERS4	10.8132	-0.44195	-1.35844	1.26161e-05	0.000671839
CFAP46	0.189362	-0.755831	-1.6886	1.47555e-05	0.000748894
CIART	0.125145	-0.627038	-1.54439	0.00102905	0.0166136
CMTM8	2.07603	-0.548094	-1.46215	0.000114602	0.00350427
CNTNAP1	0.47081	-0.459499	-1.37506	0.000805984	0.0139668
COQ2	15.1779	-0.331262	-1.25811	9.82548e-09	3.09181e-06
CR2	18.3749	-0.453728	-1.36957	4.03779e-05	0.00161891
CRABP1	0.175004	-0.951623	-1.93405	0.00117528	0.0183731
CRYBG2	0.466081	-0.418959	-1.33696	0.00123796	0.0191468
CSKMT	5.01923	-0.300252	-1.23136	8.0435e-05	0.00271362
CSPG4	0.115722	-0.921093	-1.89355	0.00148639	0.0218797
CXXC5	2.60734	-0.439874	-1.35649	4.07959e-07	5.15369e-05
CYSLTR1	5.17176	-0.271949	-1.20744	0.000626608	0.0116707
DAB2	0.228418	-0.860797	-1.81604	1.45902e-05	0.000743737
DACT1	0.304474	-0.371504	-1.2937	0.00135559	0.0203833
DBN1	0.67487	-0.369341	-1.29176	0.000438986	0.00900181
DIRAS2	7.25463	-0.486536	-1.40108	4.05031e-05	0.00161891
DMTN	0.229679	-1.92342	-3.79321	0.000195392	0.00507402
DMWD	0.579014	-0.462967	-1.37837	1.63285e-05	0.000816755
DNMT3B	2.09599	-0.301565	-1.23248	0.00222257	0.0292517
DOC2G	1.12181	-0.602085	-1.51791	0.000201119	0.00517644
DOK7	0.496325	-0.428872	-1.34618	0.00206831	0.027857
DPYSL3	1.44936	-0.614194	-1.5307	0.000749577	0.0132512
DSCAML1	0.00835432	-0.966887	-1.95462	0.00413944	0.0456375
DUOX2	0.0197159	-1.16279	-2.2389	0.00104203	0.0167761
EBF1	6.44148	-0.272848	-1.20819	0.00399187	0.0443721
EDNRB	0.141909	-0.738313	-1.66822	0.0029764	0.0360732
EGR2	0.809048	-0.46377	-1.37914	0.00192344	0.0263964
ELANE	1.09054	-0.944492	-1.92451	0.000134201	0.00391673
EMID1	0.627816	-0.52067	-1.43462	1.88141e-05	0.000917229
EPHX4	1.53366	-0.414141	-1.33251	0.00102589	0.016582
ERBB2	3.74841	-0.523997	-1.43793	8.08043e-05	0.00272078
ERMAP	0.29507	-0.625222	-1.54245	0.000257203	0.00619168
FA2H	0.045257	-0.893931	-1.85823	0.00347886	0.0403814
FCRLA	19.3219	-0.364267	-1.28723	0.000506934	0.00993602
FGD5	0.109279	-0.731091	-1.65989	0.00234113	0.0301473
FHAD1	0.329353	-0.761381	-1.69511	0.000771788	0.013547
FMNL3	5.10967	-0.295392	-1.22722	1.29661e-06	0.000128968
FNDC4	0.570634	-0.554991	-1.46916	5.90628e-05	0.00212515
FZD5	8.43087	-0.424	-1.34164	3.99569e-05	0.00161261
GATA2	0.335802	-0.503689	-1.41783	0.00421694	0.0462295
GCSAML	1.0146	-0.445391	-1.36168	0.00456869	0.04845
GPR161	0.274507	-0.363847	-1.28685	0.0032171	0.0381359
GPR19	0.454281	-0.332826	-1.25948	0.000136762	0.0039515
GPR55	2.37078	-0.381228	-1.30245	9.72484e-07	0.000104539
GPRC5C	0.123413	-1.24532	-2.37072	0.000299001	0.00690896
HABP4	6.26203	-0.361447	-1.28471	7.15668e-06	0.000452046
HBZ	0.217157	-2.99127	-7.95174	1.00897e-05	0.000582078
HDAC9	3.43316	-0.260373	-1.19779	0.000332713	0.00745888
HINT2	8.08623	-0.274761	-1.20979	2.46049e-06	0.000207726
HOMER2	0.876789	-0.610634	-1.52693	0.00191693	0.0263513
HR	0.16084	-0.520032	-1.43399	0.000209147	0.0053479
HSPB8	1.4619	-0.956939	-1.94119	2.11917e-06	0.000183382
HVCN1	23.3148	-0.396464	-1.31628	6.71511e-06	0.000436911
ID3	9.20276	-0.369623	-1.29202	0.000699894	0.0126441
IGDCC3	0.31718	-0.654333	-1.57389	0.00186219	0.0258038
IGF2BP3	0.589331	-0.989159	-1.98503	1.18507e-06	0.000122814
ITGAD	6.02329	-0.660823	-1.58098	1.21439e-05	0.000654749
KBTBD11	0.191499	-0.281066	-1.21509	0.00342118	0.039926
KBTBD6	0.681402	-0.265983	-1.20245	0.0028984	0.0354255
KCNIP3	0.261521	-0.562298	-1.47662	0.00445195	0.0476499
KCNK10	0.391351	-0.916694	-1.88778	1.23536e-05	0.000661933
KCNN4	3.35767	-0.343294	-1.26865	0.00344352	0.0401327
KIAA0040	87.8126	-0.301622	-1.23253	0.000352433	0.00771006
KIRREL2	0.135708	-0.753886	-1.68633	4.75515e-05	0.00182883
KIT	1.66586	-0.38389	-1.30486	7.85482e-06	0.000485512
KLRJ1	0.568213	-0.608927	-1.52512	0.0038105	0.0428872
LAMA4	0.314175	-0.789283	-1.72822	0.0012088	0.0187629
LBH	66.5972	-0.40063	-1.32008	1.23589e-09	5.94155e-07
LGR4	1.97172	-0.415235	-1.33352	0.000482434	0.00959711
LOC100139881	2.84795	-0.649101	-1.56819	0.000724573	0.012928
LOC100847574	2.0143	-1.52555	-2.87897	8.96739e-07	9.8227e-05
LOC100848074	0.165706	-0.964	-1.95071	0.0042868	0.0466757
LOC107131596	0.0575607	-1.15954	-2.23387	0.00035066	0.00768211
LOC112441567	1.16307	-0.593278	-1.50867	0.00438179	0.0470871
LOC112441635	0.0169384	-2.5549	-5.87625	0.0021104	0.0282699
LOC112447087	4.98962	-0.378952	-1.3004	0.0031464	0.0374361
LOC112448270	0.756863	-0.47699	-1.39184	0.00045905	0.00928127
LOC112449072	2.72398	-2.77697	-6.85409	5.03791e-08	1.07643e-05
LOC505306	12.9226	-0.474711	-1.38964	0.000868614	0.0145952
LOC506495	2.16209	-0.302537	-1.23331	0.000309211	0.00705074
LOC510613	0.341838	-0.35261	-1.27687	0.00388809	0.043526
LOC512869	0.26365	-1.40437	-2.64701	0.000244056	0.00597436
LOC513767	2.58847	-0.285555	-1.21888	0.000545479	0.0104779
LOC515828	7.89149	-0.459606	-1.37517	0.000867746	0.0145952
LOC615640	0.323845	-1.19716	-2.29288	2.22744e-05	0.00101985
LOC751811	1.35152	-0.567977	-1.48244	7.59313e-05	0.00260226
LOC786796	0.571057	-0.775657	-1.71197	0.00133044	0.0201452
LPAR3	1.12208	-0.33904	-1.26491	0.000428615	0.00884153
LTB	87.1049	-0.275982	-1.21082	7.85954e-05	0.00266716
MAATS1	0.461327	-0.317861	-1.24648	0.00455321	0.0483747
MAP10	1.2283	-0.266638	-1.203	0.0007519	0.0132652
MAP3K8	13.8891	-0.334512	-1.26095	0.00304233	0.0366105
ME3	0.209236	-0.756435	-1.68931	0.000347725	0.00764685
MET	1.20888	-0.407692	-1.32656	0.000179878	0.00483853
MMP28	1.72123	-0.377654	-1.29923	0.00300157	0.0362798
MREG	9.66882	-0.318479	-1.24701	1.04278e-05	0.000589652
MS4A1	131.353	-0.325014	-1.25268	0.000220711	0.00552801
MYCL	0.345336	-0.508943	-1.42301	0.00291837	0.0355692
MYH14	1.00609	-0.598996	-1.51466	0.000329847	0.00743315
MYH6	0.00431223	-2.46424	-5.51835	0.000552453	0.0105844
MYLIP	16.7579	-0.30581	-1.23611	1.77676e-07	2.87215e-05
NCAM2	0.0271103	-0.949933	-1.93178	0.00279426	0.0345239
NREP	3.33166	-0.414894	-1.3332	0.000156851	0.00433768
NUGGC	2.64521	-0.409202	-1.32795	2.43825e-05	0.00109041
NUPR2	5.90366	-0.263772	-1.20061	0.00399833	0.0443869
P2RY10	33.1107	-0.300106	-1.23124	1.62539e-07	2.70487e-05
PANX2	0.325304	-0.522813	-1.43675	0.000389006	0.00823046
PAX5	9.76332	-0.362879	-1.28599	0.000426023	0.00880906
PCP4L1	0.167152	-0.629925	-1.54748	0.00092582	0.0153332
PEG10	0.0359576	-0.592563	-1.50792	0.00432407	0.0467729
PKNOX2	0.129071	-0.965519	-1.95277	9.36412e-07	0.000101928
PLCL1	1.45516	-0.299699	-1.23089	0.00224084	0.0293727
PLXDC1	0.547875	-0.653373	-1.57284	2.37534e-07	3.36967e-05
PODNL1	0.61291	-0.34748	-1.27234	0.00071939	0.0128616
PPP1R13L	0.316252	-0.411815	-1.33036	0.000858004	0.0145335
PTCH1	0.796736	-0.280192	-1.21436	0.00360717	0.0414262
PTGDR	2.26651	-0.349347	-1.27398	0.00259448	0.0326819
PTGDR2	2.42534	-0.345081	-1.27022	0.00420966	0.0461995
PTPRCAP	51.6234	-0.277326	-1.21195	3.17413e-05	0.00135307
PXDC1	5.23543	-0.300166	-1.23129	0.000857255	0.0145335
PYGM	0.330916	-0.664784	-1.58533	1.12598e-05	0.000624594
RAB40B	0.024172	-1.08254	-2.11776	0.00475707	0.0499882
RAPGEF5	0.145491	-0.597457	-1.51305	0.000212036	0.00540458
RASGRP3	13.4826	-0.278974	-1.21333	4.89118e-05	0.00186457
RCBTB1	4.84279	-0.324848	-1.25253	0.00133216	0.0201535
REM1	0.0179581	-1.54104	-2.91005	0.00198778	0.0269612
RHOBTB2	2.96785	-0.377522	-1.29911	9.35141e-05	0.00301387
RIMS3	0.155912	-0.53563	-1.44957	0.000214684	0.00542413
RNASEH2A	7.01284	-0.286203	-1.21943	6.41755e-06	0.000420714
RNF144A	7.78918	-0.410545	-1.32919	2.41849e-06	0.00020518
RPS6KA5	5.13446	-0.264173	-1.20095	1.03087e-06	0.000109455
RUNDC3A	0.815476	-0.276051	-1.21088	0.00195187	0.0266832
SCN4A	0.0681104	-0.562832	-1.47717	0.00428286	0.0466757
SCRN1	0.43822	-0.391762	-1.31199	0.00301339	0.0363687
SEL1L3	11.0474	-0.329837	-1.25687	0.00157404	0.0228529
SEMA6B	0.366964	-2.68982	-6.45233	2.65761e-05	0.00116739
SH3BGRL2	0.260858	-0.833968	-1.78258	0.000110642	0.00342556
SLC25A39	17.0519	-0.267695	-1.20388	0.000552857	0.0105844
SLC38A5	1.22201	-0.362299	-1.28547	0.00023087	0.00571626
SLC9A7	8.63434	-0.267417	-1.20365	1.09455e-05	0.000611076
SMCO4	4.54818	-0.33777	-1.2638	6.12639e-07	7.31238e-05
SNTB1	6.11447	-0.328699	-1.25588	1.90029e-06	0.000169528
SPDEF	1.50511	-0.602313	-1.51815	0.00045811	0.00927311
SPIB	51.9945	-0.305587	-1.23592	0.000838477	0.0143253
SRGAP3	0.830982	-0.556524	-1.47072	1.05143e-05	0.000590814
SSPN	1.2365	-0.266197	-1.20263	0.00418206	0.0459898
ST6GAL1	17.6089	-0.290244	-1.22285	2.69596e-07	3.66033e-05
ST8SIA1	1.39702	-0.480635	-1.39536	0.000711152	0.0127808
STAC2	1.36386	-0.656051	-1.57576	0.000162782	0.00446477
SYCE1L	3.69419	-0.346329	-1.27132	0.00103356	0.0166709
TBX21	18.3045	-0.405508	-1.32456	2.31603e-05	0.00104931
TCTN1	3.29445	-0.512223	-1.42625	2.94784e-06	0.000241653
TEKT2	0.181669	-0.436928	-1.35372	0.00262633	0.0329138
TLR10	8.67968	-0.454978	-1.37076	9.86906e-06	0.000577236
TMEM64	4.26234	-0.300063	-1.2312	2.34041e-05	0.00105483
TNFRSF9	0.220838	-0.488784	-1.40326	0.00442059	0.0473728
TRABD2B	0.735017	-0.333099	-1.25972	0.00217306	0.0288371
VAV2	4.94057	-0.259512	-1.19707	0.00389174	0.0435387
VSIG10	6.03618	-0.294902	-1.2268	3.99727e-05	0.00161261
WC1	1.79618	-0.57657	-1.4913	0.00155898	0.0226886
WC1.3	4.68295	-0.643211	-1.5618	0.0029382	0.0357136
WC-7	1.96553	-0.385091	-1.30594	0.000997823	0.0162001
WNT5A	0.0984389	-1.10849	-2.1562	0.000250014	0.00606871
ZAN	0.100535	-0.548168	-1.46223	0.00108348	0.0173307
ZBTB32	6.17398	-0.356227	-1.28007	0.000234045	0.00577834
ZBTB46	0.561286	-0.300096	-1.23123	0.00436609	0.0470217
ZCCHC13	3.15197	-0.360594	-1.28395	0.000305704	0.00700771
ZNF296	2.47052	-0.269071	-1.20503	0.00260818	0.0327986
ZNF608	1.14874	-0.368075	-1.29063	0.000515845	0.0100764
ZNF683	1.65676	-0.554684	-1.46885	0.00116091	0.0182482
ZP3	1.06881	-0.433645	-1.35064	9.99995e-05	0.00318728
ZPBP2	8.32355	-0.271307	-1.2069	9.24007e-05	0.00299472

## Sheet: Table S3
Table S3. Cluster analysis using DAVID based on list of 1,032 DEG with FC≥1.2 and FDR P <0.05 between cows with LOW IGF1 (<35ng/ml, n=35) and HIGH IGF1 (>100 ng/ml, n=43) in leukocytes of cows at 14 days in milk, based on the global transcriptome
Annotation Cluster 1	Enrichment Score: 7.688
Category	Term	Count	%	PValue	List Total	Pop Hits	Pop Total	Fold Enrich	Benjamini	FDR	Genes
UP_SEQ_FEATURE	disulfide bond	85	8.05687	4.26049e-15	271	830	6267	2.36827	3.60438e-12	3.60438e-12	LGALS3BP, CXCL8, DEFB7, EPO, ELN, HEPACAM2, HP, ADM, BLA-DQB, CTSV, HTR2A, CLU, TREM1, THBD, ADAMTS2, EDNRB, LAMP1, CA4, ENPP2, TIMP2, IL12B, PROK2, CTSH, CD36, TIMP1, PAMR1, PRKG1, PTGDR, CTSB, FGB, FGA, PTGIR, FCER1G, VWF, ITGA2, HGF, RNASE6, GPBAR1, RNASE4, DEFB10, GLRX2, MMP9, ADRA2A, TNFRSF1A, F5, ACE2, VCAN, CATHL4, GPR161, KIT, CHI3L1, ANG, ZP3, MFGE8, DEFB4A, TLR4, CFB, DNASE1L1, CD163L1,…
UP_SEQ_FEATURE	glycosylation site:N-linked (GlcNAc...)	93	8.81517	2.39448e-14	271	988	6267	2.17679	1.01287e-11	1.01287e-11	LGALS3BP, SCARB1, SERPINA1, EPO, HEPACAM2, HP, BLA-DQB, SLC2A3, CTSV, HTR2A, PLOD1, PKD2, CLU, TREM1, SLC6A2, SLC6A4, ADAMTS2, LAMP1, CREB3L3, CA4, ENPP2, IL12B, CTSH, CD36, TIMP1, PAMR1, PTGDR, CTSB, ACVR1, FGB, TMEM150B, PTGIR, SERPINA3-1, VWF, ITGA2, SLC11A1, HGF, RNASE6, GPBAR1, RNASE4, MMP9, ADRA2A, TNFRSF1A, F5, ACE2, VCAN, FNDC4, ASPH, GPR161, KIT, SELENOP, PLBD1, CHI3L1, TLR10, ANG, ZP3, …
UP_KEYWORDS	Disulfide bond	154	14.5972	4.24909e-14	904	1643	17808	1.84642	1.33422e-11	1.27473e-11	SCARB1, DEFB7, EPO, HFE, LOC786796, LOC100139881, HP, BLA-DQB, DEFB1, CLU, CELSR3, MYLK, EFEMP1, EDNRB, LAMP1, FCGRT, C1RL, ENPP2, IL12B, PROK2, PAMR1, PTGDR, CMKLR1, KIRREL2, HGF, WNT5A, RNASE6, DEFB13, DEFB10, RNASE4, ADAM19, ACE2, CLEC4D, CATHL4, GPR161, CARD19, PLBD1, ROR2, CFB, NOTCH3, CSF1R, CHRNA2, CFI, LPAR1, C2, PRDX5, CD14, A2M, ELANE, WC-7, CD163, FZD2, FZD5, FZD4, ST8SIA1, INSR, RAB27…
UP_SEQ_FEATURE	signal peptide	88	8.34123	1.54889e-11	271	1010	6267	2.01489	4.36788e-09	4.36788e-09	LGALS3BP, CXCL8, SERPINA1, TNFAIP6, DEFB7, EPO, ELN, HEPACAM2, HP, ADM, BLA-DQB, CTSV, PLOD1, CLU, TREM1, ADAMTS2, EDNRB, LAMP1, CA4, ENPP2, TIMP2, IL12B, PROK2, CTSH, TIMP1, PAMR1, CTSB, ACVR1, FGA, TMEM150B, FCER1G, SERPINA3-1, VWF, ITGA2, HGF, SHISA5, RNASE6, RNASE4, DEFB10, MMP9, TNFRSF1A, F5, ACE2, VCAN, FNDC4, CATHL4, KIT, SELENOP, PLBD1, CHI3L1, TLR10, ANG, ZP3, MFGE8, DEFB4A, MET, TLR4, G…
UP_KEYWORDS	Glycoprotein	104	9.85782	1.2298e-08	904	1157	17808	1.77071	1.28719e-06	1.2298e-06	SCARB1, EPO, HP, BLA-DQB, PLOD1, CLU, LAMP1, CREB3L3, ENPP2, IL12B, PAMR1, PTGDR, CMKLR1, ACVR1, SLC11A1, HGF, RNASE6, ACE2, FNDC4, GPR161, SELENOP, PLBD1, CFB, SDC4, ECSCR, LPAR1, GPR84, SLC1A5, SPATA6, C2, CD14, A2M, SLC38A5, DRD5, CD163, ACE, RNASE10, ST8SIA1, TMEM120A, SELP, TF, P4HA1, SLC26A8, NMUR2, ALPL, TPP1, PAM, LGMN, LGALS3BP, SERPINA1, HEPACAM2, SLC2A3, CTSV, HTR2A, PKD2, TREM1, SLC6A…
UP_SEQ_FEATURE	topological domain:Extracellular	48	4.54976	1.70551e-06	271	540	6267	2.0556	0.000360715	0.000360715	SCARB1, HEPACAM2, ECSCR, LPAR1, BLA-DQB, SLC2A3, GPR84, SLC1A5, HTR2A, PKD2, TREM1, SLC6A2, SLC6A4, THBD, EDNRB, P2RY1, CD36, LDLR, SLC38A5, PTGDR, DRD5, ACVR1, TMEM150B, PTGIR, CD163, FCER1G, ITGA2, SLC11A1, TMEM120A, SHISA5, GPBAR1, ACVR2B, ADRA2A, TNFRSF1A, SELP, ACE2, GJB2, FNDC4, IL2RA, GPR161, KIT, SLC26A8, NMUR2, TLR10, ZP3, TLR4, MET, GPRC5C
UP_SEQ_FEATURE	topological domain:Cytoplasmic	57	5.40284	2.72013e-05	271	760	6267	1.73441	0.00460245	0.00460245	SCARB1, MPV17L, HEPACAM2, BLA-DQB, SLC2A3, HTR2A, PKD2, TREM1, SLC6A2, SLC6A4, THBD, EDNRB, LAMP1, CREB3L3, CD36, PTGDR, ACVR1, TMEM150B, PTGIR, FCER1G, ITGA2, SLC11A1, SHISA5, GPBAR1, ADRA2A, TNFRSF1A, ACE2, FNDC4, ASPH, GPR161, KIT, TLR10, ZP3, MET, TLR4, GPRC5C, MAOA, ECSCR, LPAR1, GPR84, SLC1A5, PLN, P2RY1, LDLR, SLC38A5, DRD5, CD163, ST8SIA1, TMEM120A, ACVR2B, SELP, GJB2, IL2RA, ALOX5AP, SLC…
UP_SEQ_FEATURE	transmembrane region	79	7.48815	0.000336329	271	1269	6267	1.43965	0.0474225	0.0474225	CLIC5, SCARB1, MPV17L, HEPACAM2, DYSF, BLA-DQB, SLC2A3, HTR2A, TMEM53, COMT, IER3IP1, PKD2, TREM1, SLC6A2, SLC6A4, THBD, EDNRB, LAMP1, CREB3L3, LOC534742, TSPO, SMCO4, CD36, PTGDR, ACVR1, CERS4, TRPC5, TMEM150B, PTGIR, FCER1G, ITGA2, SLC11A1, SHISA5, GPBAR1, ADRA2A, TNFRSF1A, ACE2, FNDC4, ASPH, GPR161, KIT, TLR10, FAR2, ZP3, MET, TLR4, GPRC5C, MAOA, LSMEM1, ABHD1, ECSCR, LPAR1, GPR84, SLC1A5, FOX…
UP_KEYWORDS	Secreted	66	6.25592	0.00102507	904	868	17808	1.49786	0.0289356	0.0276455	LGALS3BP, CXCL8, SERPINA1, DEFB7, EPO, ELN, HP, ADM, DEFB1, CLU, ADAMTS2, ENPP2, TIMP2, IL12B, PROK2, EMILIN1, LGALS9, TIMP1, PAMR1, CTSB, FGB, FGA, SERPINA3-1, VWF, WNT5A, DEFB13, RNASE4, DEFB10, MMP9, F5, ACE2, VCAN, NOV, CATHL4, SELENOP, CHI3L1, ANG, ZP3, MFGE8, DEFB4A, S100A9, CFB, S100A8, CD163L1, SEMA3C, ITIH1, SPATA6, C2, CCL8, S100A12, CD14, A2M, CCL16, CD163, ACE, RNASE10, IGF1, MANF, NE…
UP_KEYWORDS	Cell membrane	62	5.87678	0.992634	904	1581	17808	0.772514	1	0.992634	SCARB1, DYSF, SLC2A3, HTR2A, COMT, PKD2, SLC6A2, SLC6A4, EDNRB, LAMP1, CA4, FLOT2, CD36, PTGDR, SNTA1, CMKLR1, TMEM150B, PTGIR, FCER1G, GPBAR1, ADRA2A, TNFRSF1A, ACE2, ADORA2A, GPR161, KIT, ZP3, TLR4, S100A9, GPRC5C, S100A8, CHRNA2, ECSCR, LPAR1, GPR84, NOD2, SLC1A5, AIF1, CFAP126, CDH20, P2RY2, GJA10, P2RY1, S100A12, CDH26, CD14, PDE6A, LDLR, GPR158, SLC38A5, DRD5, CD163, DMTN, KCNIP3, LOC100848…
Annotation Cluster 2	Enrichment Score: 4.955
Category	Term	Count	%	PValue	List Total	Pop Hits	Pop Total	Fold Enrich	Benjamini	FDR	Genes
UP_KEYWORDS	Transmembrane helix	318	30.1422	3.82385e-07	904	4935	17808	1.26937	3.00172e-05	2.86789e-05	ZAN, AQP9, ZDHHC2, FGFRL1, EDNRB, HTR7, CREB3L3, C3AR1, SMCO4, SLC12A7, WLS, PTGDR, CMKLR1, ACVR1, CPT1A, ST6GAL1, KCNK10, SLC11A1, KCNK13, FNDC3B, ACSL6, KCNK17, TMEM170B, EREG, SLC5A6, ACE2, ABCA10, ADCY9, FNDC4, ADGRB2, GPR161, NINJ2, KDELR3, FAR2, CDS1, IGSF8, TTYH3, SDC4, MAOA, LOC504861, LPAR1, MGST1, TMTC2, LPAR3, CD1E, SLC6A20, CD1B, LOC536660, CD79B, PCNX2, APH1B, GJA10, CD19, KCNN4, TRP…
UP_KEYWORDS	Transmembrane	318	30.1422	5.39199e-07	904	4953	17808	1.26475	3.38617e-05	3.2352e-05	ZAN, AQP9, ZDHHC2, FGFRL1, EDNRB, HTR7, CREB3L3, C3AR1, SMCO4, SLC12A7, WLS, PTGDR, CMKLR1, ACVR1, CPT1A, ST6GAL1, KCNK10, SLC11A1, KCNK13, FNDC3B, ACSL6, KCNK17, TMEM170B, EREG, SLC5A6, ACE2, ABCA10, ADCY9, FNDC4, ADGRB2, GPR161, NINJ2, KDELR3, FAR2, CDS1, IGSF8, TTYH3, SDC4, MAOA, LOC504861, LPAR1, MGST1, TMTC2, LPAR3, CD1E, SLC6A20, CD1B, LOC536660, CD79B, PCNX2, APH1B, GJA10, CD19, KCNN4, TRP…
UP_KEYWORDS	Membrane	354	33.5545	9.58548e-07	904	5650	17808	1.23425	5.0164e-05	4.79274e-05	ZAN, AQP9, ZDHHC2, FGFRL1, EDNRB, HTR7, CREB3L3, C3AR1, SMCO4, SLC12A7, WLS, PTGDR, CMKLR1, ACVR1, CPT1A, ST6GAL1, KCNK10, SLC11A1, KCNK13, FNDC3B, ACSL6, KCNK17, TMEM170B, EREG, SLC5A6, ACE2, ABCA10, ADCY9, FNDC4, ADGRB2, GPR161, NINJ2, KDELR3, FAR2, CDS1, IGSF8, TTYH3, SDC4, MAOA, STXBP1, LOC504861, LPAR1, MGST1, TMTC2, LPAR3, CD1E, SLC6A20, CD1B, CFAP126, LOC536660, CD79B, PCNX2, APH1B, GJA10,…
GOTERM_CC_DIRECT	GO:0016021~integral component of membrane	241	22.8436	0.0767059	821	4185	15461	1.08447	0.82404	0.799933	ZAN, ZDHHC2, HS6ST1, FGFRL1, EDNRB, CREB3L3, SMCO4, WLS, CMKLR1, CPT1A, ST6GAL1, SLC11A1, FNDC3B, ACSL6, TMEM170B, EREG, SLC5A6, ACE2, ABCA10, FNDC4, ADGRB2, GPR161, NINJ2, KDELR3, FAR2, CDS1, IGSF8, SDC4, MAOA, MGST1, TMTC2, LPAR3, CD1E, CD1B, LOC536660, PCNX2, GJA10, CD19, KCNN4, TRPM6, CCR1, ACE, TMEM184B, FZD2, ABCA5, FZD5, ABCA6, FZD4, ABCA3, TNFSF13, ABCA9, PILRA, GP5, VASN, GP9, FA2H, MARC…
Annotation Cluster 3	Enrichment Score: 3.838
Category	Term	Count	%	PValue	List Total	Pop Hits	Pop Total	Fold Enrich	Benjamini	FDR	Genes
GOTERM_MF_DIRECT	GO:0005044~scavenger receptor activity	12	1.13744	3.57788e-05	688	49	13095	4.66125	0.0262974	0.0262974	LGALS3BP, MARCO, CD163, WC1.3, CD163L1, WC1, LOC786796, CFI, ENPP2, PRG4, SCARF1, WC-7
INTERPRO	IPR001190:Speract/scavenger receptor	9	0.853081	0.000144917	879	31	16802	5.54949	0.047901	0.0474217	LGALS3BP, MARCO, CD163, WC1.3, CD163L1, WC1, LOC786796, CFI, WC-7
INTERPRO	IPR017448:Speract/scavenger receptor-related	9	0.853081	0.000232425	879	33	16802	5.21316	0.047901	0.0474217	LGALS3BP, MARCO, CD163, WC1.3, CD163L1, WC1, LOC786796, CFI, WC-7
SMART	SM00202:SR	9	0.853081	0.000369977	526	31	8740	4.82399	0.0272106	0.0266646	LGALS3BP, MARCO, CD163, WC1.3, CD163L1, WC1, LOC786796, CFI, WC-7
Annotation Cluster 4	Enrichment Score: 3.380
Category	Term	Count	%	PValue	List Total	Pop Hits	Pop Total	Fold Enrich	Benjamini	FDR	Genes
GOTERM_BP_DIRECT	GO:0042742~defense response to bacterium	17	1.61137	6.17496e-06	754	81	13824	3.84792	0.0079163	0.00790704	CEBPB, FCER1G, DEFB7, HP, DEFB13, DEFB10, DEFB1, NOD2, NLRC4, TNFRSF1A, CLEC4D, CATHL4, BCL3, LAP, DEFB4A, FCGR1A, ELANE
INTERPRO	IPR006080:Beta defensin/Neutrophil defensin	6	0.56872	0.000224188	879	12	16802	9.55745	0.047901	0.0474217	DEFB7, DEFB13, LAP, DEFB10, DEFB1, DEFB4A
UP_KEYWORDS	Antimicrobial	11	1.04265	0.000334634	904	54	17808	4.01278	0.011675	0.0111545	DEFB7, CATHL4, HP, CHI3L1, DEFB13, LAP, DEFB10, DEFB1, DEFB4A, S100A9, S100A8
SMART	SM00048:DEFSN	6	0.56872	0.000426735	526	12	8740	8.30798	0.0272106	0.0266646	DEFB7, DEFB13, LAP, DEFB10, DEFB1, DEFB4A
INTERPRO	IPR001855:Beta defensin type	6	0.56872	0.000519123	879	14	16802	8.1921	0.0637358	0.063098	DEFB7, DEFB13, LAP, DEFB10, DEFB1, DEFB4A
UP_KEYWORDS	Defensin	6	0.56872	0.00341832	904	21	17808	5.62832	0.0715568	0.0683663	DEFB7, DEFB13, LAP, DEFB10, DEFB1, DEFB4A
UP_KEYWORDS	Antibiotic	8	0.758294	0.00624633	904	44	17808	3.58166	0.108964	0.104105	DEFB7, CATHL4, HP, DEFB13, LAP, DEFB10, DEFB1, DEFB4A
Annotation Cluster 5	Enrichment Score: 2.772
Category	Term	Count	%	PValue	List Total	Pop Hits	Pop Total	Fold Enrich	Benjamini	FDR	Genes
UP_KEYWORDS	Inflammatory response	12	1.13744	0.000218192	904	61	17808	3.87524	0.00856405	0.00818222	PYCARD, CD163, CCL8, CXCL8, CHI3L1, S100A12, TLR10, NLRC4, CD14, S100A9, TLR4, S100A8
UP_KEYWORDS	Innate immunity	15	1.4218	0.000412997	904	98	17808	3.01517	0.0129681	0.0123899	FGB, FGA, NOD2, NLRC4, C2, PYCARD, S100A12, TLR10, CD14, TLR4, S100A9, LGR4, CFB, S100A8, MSRB1
UP_KEYWORDS	Immunity	19	1.80095	0.00127825	904	160	17808	2.33927	0.0289356	0.0276455	FGB, FGA, HP, BLA-DQB, NOD2, NLRC4, C2, PYCARD, IL2RA, S100A12, TLR10, LGALS9, CD14, TLR4, S100A9, LGR4, CFB, S100A8, MSRB1
GOTERM_BP_DIRECT	GO:0045087~innate immune response	19	1.80095	0.0706564	754	227	13824	1.53458	1	0.99922	BLK, FGB, FGA, FCER1G, NOD2, NLRC4, BMX, C2, PYCARD, CLEC4D, S100A12, TLR10, PTX3, CD14, TLR4, S100A9, LGR4, S100A8, MSRB1
Annotation Cluster 6	Enrichment Score: 2.723
Category	Term	Count	%	PValue	List Total	Pop Hits	Pop Total	Fold Enrich	Benjamini	FDR	Genes
INTERPRO	IPR000421:Coagulation factor 5/8 C-terminal type domain	7	0.663507	0.000412211	879	20	16802	6.69022	0.0576683	0.0570912	NRP1, NRP2, CNTNAP1, MFGE8, DCBLD1, DCBLD2, F5
SMART	SM00231:FA58C	7	0.663507	0.000455027	526	18	8740	6.46177	0.0272106	0.0266646	NRP1, NRP2, CNTNAP1, MFGE8, DCBLD1, DCBLD2, F5
INTERPRO	IPR008979:Galactose-binding domain-like	9	0.853081	0.0361874	879	73	16802	2.35663	1	0.990701	NRP1, NRP2, CNTNAP1, GLB1L, LAMC1, MFGE8, DCBLD1, DCBLD2, F5
Annotation Cluster 7	Enrichment Score: 2.549
Category	Term	Count	%	PValue	List Total	Pop Hits	Pop Total	Fold Enrich	Benjamini	FDR	Genes
INTERPRO	IPR001452:Src homology-3 domain	23	2.18009	0.000740655	879	199	16802	2.20926	0.0695154	0.0688197	BLK, SH3GL3, DOCK4, ARHGEF37, NCF4, ITSN1, SH3RF1, MPP7, VAV2, SH3PXD2A, PPP1R13L, STAC2, SH3PXD2B, TP53BP2, TRIP10, SH3BP4, SRGAP3, DOCK1, SH3GL2, RIMBP3B, SASH1, SKAP2, SH3D19
INTERPRO	IPR011511:Variant SH3	9	0.853081	0.00207229	879	45	16802	3.82298	0.161063	0.159451	SH3PXD2B, SH3BP4, SRGAP3, SH3RF1, MPP7, RIMBP3B, SASH1, VAV2, SH3D19
SMART	SM00326:SH3	23	2.18009	0.00211111	526	189	8740	2.02205	0.0901746	0.0883651	BLK, SH3GL3, DOCK4, ARHGEF37, NCF4, ITSN1, SH3RF1, MPP7, VAV2, SH3PXD2A, PPP1R13L, STAC2, SH3PXD2B, TP53BP2, TRIP10, SH3BP4, SRGAP3, DOCK1, SH3GL2, RIMBP3B, SASH1, SKAP2, SH3D19
UP_KEYWORDS	SH3 domain	14	1.32701	0.0196751	904	135	17808	2.04287	0.25812	0.246611	BLK, NCF4, ITSN1, SH3RF1, MPP7, VAV2, SH3PXD2A, SH3PXD2B, TP53BP2, TRIP10, SRGAP3, SH3GL2, SKAP2, SH3D19
Annotation Cluster 8	Enrichment Score: 2.492
Category	Term	Count	%	PValue	List Total	Pop Hits	Pop Total	Fold Enrich	Benjamini	FDR	Genes
INTERPRO	IPR011993:Pleckstrin homology-like domain	38	3.6019	0.000228114	879	382	16802	1.90148	0.047901	0.0474217	ITSN1, FAM129A, FAM129C, MTMR7, PLD2, ARHGAP21, SPRED1, FGD5, FGD6, EPB41L3, GRB10, HOMER3, TNS3, SNTA1, MYLIP, CADPS2, AFAP1L1, IQSEC2, HOMER2, PLCL1, PLEKHA5, CDC42BPB, ADAP1, BMX, PTPN14, VAV2, TIAM2, DAB2, DOK7, WDFY3, ELMO3, PHLDB3, PLCB1, PLCD1, SNTB1, SKAP2, SNTB2, DGKH
INTERPRO	IPR001849:Pleckstrin homology domain	23	2.18009	0.00595091	879	235	16802	1.87082	0.361971	0.358349	CADPS2, AFAP1L1, IQSEC2, PLCL1, ITSN1, PLEKHA5, CDC42BPB, ADAP1, BMX, VAV2, TIAM2, ARHGAP21, FGD5, FGD6, GRB10, ELMO3, PHLDB3, PLCD1, SNTB1, SKAP2, SNTA1, SNTB2, DGKH
SMART	SM00233:PH	22	2.08531	0.0245499	526	221	8740	1.65408	0.547532	0.536545	CADPS2, AFAP1L1, IQSEC2, PLCL1, ITSN1, PLEKHA5, CDC42BPB, ADAP1, BMX, VAV2, TIAM2, ARHGAP21, FGD5, FGD6, GRB10, PHLDB3, PLCD1, SNTB1, SKAP2, SNTA1, SNTB2, DGKH
Annotation Cluster 9	Enrichment Score: 2.374
Category	Term	Count	%	PValue	List Total	Pop Hits	Pop Total	Fold Enrich	Benjamini	FDR	Genes
UP_KEYWORDS	Laminin EGF-like domain	6	0.56872	0.00123056	904	17	17808	6.95263	0.0289356	0.0276455	LAMA5, ATRN, LAMA4, LAMC1, CELSR3, MEGF9
INTERPRO	IPR002049:EGF-like, laminin	7	0.663507	0.00659778	879	33	16802	4.05468	0.384596	0.380747	LAMA5, ATRN, LAMA4, LAMC1, SCARF1, CELSR3, MEGF9
SMART	SM00180:EGF_Lam	7	0.663507	0.00927703	526	31	8740	3.75199	0.277383	0.271817	LAMA5, ATRN, LAMA4, LAMC1, SCARF1, CELSR3, MEGF9
Annotation Cluster 10	Enrichment Score: 2.136
Category	Term	Count	%	PValue	List Total	Pop Hits	Pop Total	Fold Enrich	Benjamini	FDR	Genes
INTERPRO	IPR013783:Immunoglobulin-like fold	51	4.83412	0.00074534	879	599	16802	1.62748	0.0695154	0.0688197	LOC100336589, COL14A1, HFE, HEPACAM2, BLA-DQB, IL1RAP, PTPRK, TREM1, FGFRL1, VSIG10, PTPRG, MYLK, FCRLA, FCGRT, STBD1, IL12B, TGM3, KIRREL2, FNDC3B, EBF1, NRG1, VCAN, FNDC4, KIT, ZPBP2, ALPK2, ROR2, MET, DSCAML1, IGSF8, CSF1R, SEMA3C, CD1E, THY1, CD1B, CSF2RA, CD79B, CD19, NCAM2, FCGR1A, JAM3, CD276, SEMA4D, INSR, MYBPH, PILRA, MERTK, VASN, LRFN1, COL7A1, IL18R1
INTERPRO	IPR007110:Immunoglobulin-like domain	39	3.69668	0.00136701	879	435	16802	1.71375	0.119528	0.118332	IGSF8, CSF1R, SEMA3C, LOC100336589, HFE, HEPACAM2, BLA-DQB, CD1E, IL1RAP, PTPRK, THY1, TREM1, CD1B, FGFRL1, VSIG10, MYLK, FCRLA, CD79B, FCGRT, CD19, IL12B, NCAM2, FCGR1A, JAM3, CD276, KIRREL2, SEMA4D, MYBPH, NRG1, PILRA, MERTK, VCAN, LRFN1, KIT, ZPBP2, ALPK2, ROR2, DSCAML1, IL18R1
INTERPRO	IPR003599:Immunoglobulin subtype	30	2.8436	0.00464777	879	331	16802	1.73247	0.295556	0.292598	IGSF8, CSF1R, SEMA3C, LOC100336589, HEPACAM2, IL1RAP, PTPRK, TREM1, FGFRL1, VSIG10, MYLK, FCRLA, CD79B, CD19, NCAM2, FCGR1A, JAM3, CD276, KIRREL2, MYBPH, NRG1, PILRA, MERTK, VCAN, LRFN1, KIT, ALPK2, ROR2, DSCAML1, IL18R1
INTERPRO	IPR003598:Immunoglobulin subtype 2	19	1.80095	0.00874673	879	186	16802	1.9526	0.470641	0.465932	CSF1R, KIRREL2, HEPACAM2, MYBPH, NRG1, FGFRL1, VSIG10, MYLK, CD79B, FCRLA, LRFN1, KIT, IL12B, ROR2, NCAM2, FCGR1A, DSCAML1, JAM3, CD276
INTERPRO	IPR013098:Immunoglobulin I-set	14	1.32701	0.01132	879	122	16802	2.19351	0.510862	0.50575	CSF1R, KIRREL2, SEMA3C, MYBPH, NRG1, PTPRK, FGFRL1, VSIG10, MYLK, CD79B, ALPK2, ROR2, NCAM2, DSCAML1
UP_KEYWORDS	Immunoglobulin domain	15	1.4218	0.0225096	904	152	17808	1.94399	0.25812	0.246611	CSF1R, KIRREL2, SEMA3C, LOC100336589, HEPACAM2, THY1, MERTK, TREM1, VSIG10, MYLK, VCAN, LRFN1, KIT, IL12B, ROR2
SMART	SM00409:IG	30	2.8436	0.025637	526	331	8740	1.50598	0.547532	0.536545	IGSF8, CSF1R, SEMA3C, LOC100336589, HEPACAM2, IL1RAP, PTPRK, TREM1, FGFRL1, VSIG10, MYLK, FCRLA, CD79B, CD19, NCAM2, FCGR1A, JAM3, CD276, KIRREL2, MYBPH, NRG1, PILRA, MERTK, VCAN, LRFN1, KIT, ALPK2, ROR2, DSCAML1, IL18R1
SMART	SM00408:IGc2	19	1.80095	0.0304183	526	186	8740	1.69733	0.561001	0.549743	CSF1R, KIRREL2, HEPACAM2, MYBPH, NRG1, FGFRL1, VSIG10, MYLK, CD79B, FCRLA, LRFN1, KIT, IL12B, ROR2, NCAM2, FCGR1A, DSCAML1, JAM3, CD276
Annotation Cluster 11	Enrichment Score: 2.102
Category	Term	Count	%	PValue	List Total	Pop Hits	Pop Total	Fold Enrich	Benjamini	FDR	Genes
INTERPRO	IPR000742:Epidermal growth factor-like domain	27	2.55924	1.27341e-05	879	197	16802	2.61981	0.0163156	0.0161523	NOTCH3, LAMA5, CNTNAP1, LRP1, C1R, LAMA4, ZAN, VLDLR, LAMC1, AREG, CELSR3, PTGS1, THBD, EFEMP1, PAMR1, LDLR, SCARF1, NRG1, VASN, EREG, NELL2, SELP, ADAM19, ATRN, VCAN, MFGE8, MEGF9
INTERPRO	IPR013032:EGF-like, conserved site	22	2.08531	0.000277817	879	173	16802	2.4308	0.047901	0.0474217	NOTCH3, LRP1, C1R, ZAN, NRG1, VLDLR, LAMC1, AREG, CELSR3, VASN, EREG, NELL2, SELP, ADAM19, ATRN, THBD, VCAN, EFEMP1, MFGE8, PAMR1, LDLR, SCARF1
SMART	SM00181:EGF	22	2.08531	0.00040197	526	156	8740	2.34328	0.0272106	0.0266646	NOTCH3, LAMA5, LRP1, C1R, LAMA4, ZAN, NRG1, VLDLR, LAMC1, CELSR3, VASN, NELL2, SELP, ATRN, THBD, VCAN, EFEMP1, MFGE8, PAMR1, LDLR, SCARF1, MEGF9
UP_KEYWORDS	EGF-like domain	14	1.32701	0.0207836	904	136	17808	2.02785	0.25812	0.246611	NOTCH3, LRP1, C1R, VLDLR, PTGS1, NELL2, SELP, ATRN, THBD, VCAN, EFEMP1, MFGE8, PAMR1, LDLR
INTERPRO	IPR009030:Insulin-like growth factor binding protein, N-terminal	11	1.04265	0.0588161	879	109	16802	1.92903	1	0.990701	NELL2, NOTCH3, THBD, EFEMP1, NOV, LRP1, INSR, ERBB2, VLDLR, LDLR, SCARF1
INTERPRO	IPR001881:EGF-like calcium-binding	11	1.04265	0.0649243	879	111	16802	1.89427	1	0.990701	NELL2, NOTCH3, THBD, VCAN, EFEMP1, LRP1, C1R, VLDLR, PAMR1, LDLR, CELSR3
INTERPRO	IPR018097:EGF-like calcium-binding, conserved site	9	0.853081	0.0843279	879	87	16802	1.9774	1	0.990701	NELL2, NOTCH3, THBD, VCAN, EFEMP1, LRP1, C1R, VLDLR, LDLR
INTERPRO	IPR000152:EGF-type aspartate/asparagine hydroxylation site	9	0.853081	0.0979992	879	90	16802	1.91149	1	0.990701	NELL2, NOTCH3, THBD, VCAN, EFEMP1, LRP1, C1R, VLDLR, LDLR
SMART	SM00179:EGF_CA	11	1.04265	0.12941	526	111	8740	1.64663	1	0.983221	NELL2, NOTCH3, THBD, VCAN, EFEMP1, LRP1, C1R, VLDLR, PAMR1, LDLR, CELSR3

## Sheet: Table S4
Table S4. Lists of genes in clusters 4-6 from analysis using DAVID based on list of 1,032 DEG with FC≥1.2 and FDR P <0.05 between cows with LOW IGF1
(<35ng/ml, n=35) and HIGH IGF1 (>100 ng/ml, n=43) in leukocytes of cows at 14 days in milk, based on the global transcriptome.
Genes up-regulated in LOW IGF1 cows shown in RED, genes down-regulated shown in GREEN.
Cluster 3	Cluster 4	Cluster 5
GO:0005044~scavenger receptor activity	GO:0042742~defense response to bacterium	Inflammatory response/innate immunity
CD163	BCL3	BLA-DQB
CD163L1	CATHL4	BLK
CFI	CEBPB	BMX
ENPP2	CHI3L1	C2
LGALS3BP	CLEC4D	CCL8
LOC786796	DEFB1	CD14
MARCO	DEFB10	CD163
PRG4	DEFB13	CFB
SCARF1	DEFB4A	CHI3L1
WC1	DEFB7	CLEC4D
WC1.3	ELANE	CXCL8
WC-7	FCER1G	FCER1G
	FCGR1A	FGA
	HP	FGB
	LAP	HP
	NLRC4	IL2RA
	NOD2	LGALS9
	S100A8	LGR4
	S100A9	MSRB1
	TNFRSF1A	NLRC4
		NOD2
		PTX3
		PYCARD
		S100A8
		S100A9
		S100A12
		TLR4
		TLR10

## Sheet: Table S5
Table S5. Kegg pathway analysis using DAVID based on list of 1,032 DEG with FC≥1.2 and FDR P <0.05 between cows with LOW IGF1 (<35ng/ml, n=35) and HIGH IGF1 (>100 ng/ml, n=43) in leukocytes of cows at 14 days in milk, based on the global transcriptome
Term	Count	%	PValue	List Total	Pop Hits	Pop Total	Fold Enrich	Benjamini	FDR	Genes
bta04611:Platelet activation	24	2.27488	1.25568e-07	395	127	7550	3.61208	3.2271e-05	3.0513e-05	FGB, FGA, PTGIR, PLA2G4F, FCER1G, VWF, PLA2G4B, ITGA2, ITGB3, PLA2G4A, ADCY8, GP5, PTGS1, MYLK, MAPK13, GP9, ADCY9, GNAQ, COL5A3, P2RX1, TBXAS1, P2RY1, PLCB1, PRKG1
bta04640:Hematopoietic cell lineage	19	1.80095	9.27147e-07	395	92	7550	3.94744	0.000119138	0.000112648	CSF1R, CR2, EPO, ITGA2, ITGB3, CD1E, GP5, CD1B, GP9, IL2RA, CD19, KIT, IL3RA, CD36, CD14, FCGR1A, CD24, MS4A1, CD55
bta04610:Complement and coagulation cascades	16	1.51659	4.77369e-06	395	74	7550	4.13274	0.000408946	0.000386669	FGB, FGA, CR2, SERPINA1, VWF, C1R, CFI, TFPI, F5, C2, THBD, C8G, C3AR1, A2M, CD55, CFB
bta04060:Cytokine-cytokine receptor interaction	26	2.46445	0.000161054	395	218	7550	2.27964	0.0103477	0.00978405	CSF1R, BMPR2, CXCL8, EPO, IL1RAP, ACVR1B, TNFSF13B, CCL8, IL12B, CCR4, RELT, ACVR1, CCR1, IL15RA, TSLP, TNFRSF9, TNFSF13, TNFRSF1B, ACVR2B, TNFRSF1A, IL2RA, IL3RA, LTBR, LTB, IL18R1
bta04015:Rap1 signaling pathway	23	2.18009	0.0017219	395	214	7550	2.0543	0.0641801	0.0606839	CSF1R, DOCK4, ITGB3, INSR, HGF, CTNND1, LPAR1, LPAR3, IGF1, ADCY8, RASGRP3, MAPK13, ADCY9, ADORA2A, GNAQ, PARD3, KIT, P2RY1, ID1, RAPGEF5, PLCB1, FGF12, MET
bta04978:Mineral absorption	9	0.853081	0.0017319	395	44	7550	3.90967	0.0641801	0.0606839	TF, VDR, HMOX1, CYBRD1, STEAP1, TRPM6, STEAP2, SLC26A6, ATOX1
bta04512:ECM-receptor interaction	13	1.23223	0.0017481	395	87	7550	2.8561	0.0641801	0.0606839	LAMA5, SDC4, VWF, LAMA4, ITGA2, ITGB3, LAMC1, GP5, GP9, SV2C, COL5A3, CD36, ITGA9

## Sheet: Table S6
Table S6. Lists of genes in significant KEGG pathways from analysis using DAVID based on list of 1,032 DEG with FC≥1.2 and FDR P <0.05 between cows with LOW IGF1
(<35ng/ml, n=35) and HIGH IGF1 (>100 ng/ml, n=43) in leukocytes of cows at 14 days in milk, based on the global transcriptome.
Genes up-regulated in LOW IGF1 cows shown in RED, genes down-regulated shown in GREEN.
bta04611:	bta04640:	bta04610:	bta04060:	bta04015:	bta04978:	bta04512:
Platelet activation	Hematopoietic cell lineage	Complement and coagulation cascades	Cytokine-cytokine receptor interaction	Rap1 signaling pathway	Mineral absorption	ECM-receptor interaction
ADCY8	CD1B	C1R	ACVR1	ADCY8	ATOX1	CD36
ADCY9	CD1E	C2	ACVR1B	ADCY9	CYBRD1	COL5A3
COL5A3	CD14	C3AR1	ACVR2B	ADORA2A	HMOX1	GP5
FCER1G	CD19	C8G	BMPR2	CSF1R	SLC26A6	GP9
FGA	CD24	CD55	CCL8	CTNND1	STEAP1	ITGA2
FGB	CD36	CFB	CCR1	DOCK4	STEAP2	ITGA9
GNAQ	CD55	CFI	CCR4	FGF12	TF	ITGB3
GP5	CR2	CR2	CSF1R	GNAQ	TRPM6	LAMA4
GP9	CSF1R	F5	CXCL8	HGF	VDR	LAMA5
ITGA2	EPO	FGA	EPO	ID1		LAMC1
ITGB3	FCGR1A	FGB	IL1RAP	IGF1		SDC4
MAPK13	GP5	SERPINA1	IL2RA	INSR		SV2C
MYLK	GP9	TFPI	IL3RA	ITGB3		VWF
P2RX1	IL2RA	THBD	IL12B	KIT
P2RY1	IL3RA	VWF	IL15RA	LPAR1
PLA2G4A	ITGA2		IL18R1	LPAR3
PLA2G4B	ITGB3		LTB	MAPK13
PLA2G4F	KIT		LTBR	MET
PLCB1	MS4A1		RELT	P2RY1
PRKG1			TNFRSF1A	PARD3
PTGIR			TNFRSF1B	PLCB1
PTGS1			TNFRSF9	RAPGEF5
TBXAS1			TNFSF13	RASGRP3
VWF			TNFSF13B
			TSLP

## Sheet: Table S7
Table S7. Sub list of metabolic-related DEG with FC≥1.2 and FDR P <0.05 in comparison between cows with LOW (<35 ng/ml, n= 35) and HIGH IGF1 (>100 ng/ml, n = 43) in leucocytes
collected at 14 days in milk, based on the global transcriptome. List of search terms used to select this list is in Column F, using gene names, GOTERMs and UP_Keywords.
Up-regulated in LOW (<35 ng/ml) IGF1 cows		Down-regulated in LOW IGF1 (<35 ng/ml) cows			Search terms
AAK1	AP2 associated kinase 1	AARSD1	alanyl-tRNA synthetase domain containing 1		acetyl coA
AATK	apoptosis associated tyrosine kinase	ABCG1	ATP binding cassette subfamily G member 1		ADP
ABCA10	ATP binding cassette subfamily A member 10	ALAD	aminolevulinate dehydratase		alanine
ABCA3	ATP binding cassette subfamily A member 3	ALAS2	5'-aminolevulinate synthase 2		amino
ABCA5	ATP binding cassette subfamily A member 5	ATP12A	ATPase H+/K+ transporting non-gastric alpha2 subunit		ammon
ABCA6	ATP binding cassette subfamily A member 6	B3GALT2	beta-1,3-galactosyltransferase 2		ATP
ABCA9	ATP binding cassette subfamily A member 9	B4GALT6	beta-1,4-galactosyltransferase 6		carbohydrate
ABO	ABO blood group (transferase A, alpha 1-3-N-acetylgalactosaminyltransferase; transferase B, alpha 1-3-galactosyltransferase)	BCAT2	branched chain amino acid transaminase 2		citrate
ACVR1	activin A receptor type 1	BLK	BLK proto-oncogene, Src family tyrosine kinase		creatinine
ACVR1B	activin A receptor type 1B	COQ2	coenzyme Q2, polyprenyltransferase		gluco
ACVR2B	activin A receptor type 2B	DMTN	dematin actin binding protein		glycine
AK4	adenylate kinase 4	ERBB2	erb-b2 receptor tyrosine kinase 2		glyco
ALPK2	alpha kinase 2	KIT	KIT proto-oncogene receptor tyrosine kinase		hexo
AQP9	aquaporin 9	ME3	malic enzyme 3		keto
ASS1	argininosuccinate synthase 1	MET	MET proto-oncogene, receptor tyrosine kinase		lactate
ATP13A3	ATPase 13A3	PLCL1	phospholipase C like 1		leucine
ATP6V1G3	ATPase H+ transporting V1 subunit G3	PYGM	phosphorylase, glycogen, muscle		malate
ATP8B4	ATPase phospholipid transporting 8B4 (putative)	RNASEH2A	ribonuclease H2 subunit A		nitrogen
BMPR2	bone morphogenetic protein receptor type 2	SLC38A5	solute carrier family 38 member 5		pentose
BMX	BMX non-receptor tyrosine kinase	ST6GAL1	ST6 beta-galactoside alpha-2,6-sialyltransferase 1		propio
BST1	bone marrow stromal cell antigen 1	ST8SIA1	ST8 alpha-N-acetyl-neuraminide alpha-2,8-sialyltransferase 1		pyruvate
CA4	carbonic anhydrase 4				succinate
CAMKK1	calcium/calmodulin dependent protein kinase kinase 1				urea
CAPN10	calpain 10
CDC42BPA	CDC42 binding protein kinase alpha
CDC42BPB	CDC42 binding protein kinase beta
CHI3L1	chitinase 3-like 1 (cartilage glycoprotein-39)
CKB	creatine kinase, brain
CLU	clusterin
CNDP1	carnosine dipeptidase 1
CNDP2	CNDP dipeptidase 2 (metallopeptidase M20 family)
COMT	catechol-O-methyltransferase
CPS1	carbamoyl-phosphate synthase 1
CPT1A	carnitine palmitoyltransferase 1A
CSF1R	colony stimulating factor 1 receptor
DGKG	diacylglycerol kinase gamma
DGKH	diacylglycerol kinase eta
DHRS7	dehydrogenase/reductase 7
DNAH9	dynein axonemal heavy chain 9
DPYD	dihydropyrimidine dehydrogenase
DPYS	dihydropyrimidinase
DYRK3	dual specificity tyrosine phosphorylation regulated kinase 3
FAR2	fatty acyl-CoA reductase 2
GALC	galactosylceramidase
GATM	glycine amidinotransferase
GGT5	gamma-glutamyltransferase 5
GK	glycerol kinase
GK5	glycerol kinase 5 (putative)
GLB1L	galactosidase beta 1 like
GLRX2	glutaredoxin 2
GMPR	guanosine monophosphate reductase
GPT2	glutamic--pyruvic transaminase 2
GRB10	growth factor receptor bound protein 10
HEPACAM2	HEPACAM family member 2
HEXB	hexosaminidase subunit beta
HSPA1A	heat shock 70kDa protein 1A
HSPA1A	heat shock 70kDa protein 1A
HSPA6	heat shock protein family A (Hsp70) member 6
IDH1	isocitrate dehydrogenase (NADP(+)) 1, cytosolic
IGF1	insulin like growth factor 1
INSR	insulin receptor
KAT2B	lysine acetyltransferase 2B
KATNAL2	katanin catalytic subunit A1 like 2
LDHA	lactate dehydrogenase A
LGALS9	galectin 9
LIMK2	LIM domain kinase 2
LOC525820	cationic amino acid transporter 3
LOC534742	calcium-binding mitochondrial carrier protein SCaMC-1-like
LOC536660	phospholipid-transporting ATPase IB-like
LOC782922	prostaglandin F synthetase II-like
MAK	male germ cell associated kinase
MAOA	monoamine oxidase A
MAP3K6	mitogen-activated protein kinase kinase kinase 6
MAPK13	mitogen-activated protein kinase 13
MAPK6	mitogen-activated protein kinase 6
MCU	mitochondrial calcium uniporter
ME1	malic enzyme 1
MERTK	MER proto-oncogene, tyrosine kinase
MGAM	maltase-glucoamylase
MYH2	myosin, heavy chain 2, skeletal muscle, adult
MYLK	myosin light chain kinase
MYO19	myosin XIX
MYO6	myosin VI
NCF4	neutrophil cytosolic factor 4
NLRC4	NLR family CARD domain containing 4
NLRX1	NLR family member X1
NOD2	nucleotide binding oligomerization domain containing 2
OAS1Z	2',5'-oligoadenylate synthetase 1, 40/46kDa
P2RX1	purinergic receptor P2X 1
PAM	peptidylglycine alpha-amidating monooxygenase
PARP3	poly(ADP-ribose) polymerase family member 3
PC	pyruvate carboxylase
PDK4	pyruvate dehydrogenase kinase 4
PDXK	pyridoxal (pyridoxine, vitamin B6) kinase
PFKFB4	6-phosphofructo-2-kinase/fructose-2,6-biphosphatase 4
PGD	phosphogluconate dehydrogenase
PKM	pyruvate kinase, muscle
PLN	phospholamban
PPARD	peroxisome proliferator activated receptor delta
PRKG1	protein kinase, cGMP-dependent, type I
RBKS	ribokinase
RET	ret proto-oncogene
ROR2	receptor tyrosine kinase like orphan receptor 2
SEPT5	septin 5
SESN2	sestrin 2
SH3PXD2A	SH3 and PX domains 2A
SH3PXD2B	SH3 and PX domains 2B
SLC13A3	solute carrier family 13 member 3
SLC16A5	solute carrier family 16 member 5
SLC16A7	solute carrier family 16 member 7
SLC2A3	solute carrier family 2 member 3
SLC2A9	solute carrier family 2 member 9)
SLC6A20	solute carrier family 6 member 20
SLC7A10	solute carrier family 7 member 10
SLCO4A1	solute carrier organic anion transporter family member 4A1
SLCO4C1	solute carrier organic anion transporter family member 4C1
SLFN14	schlafen family member 14
SNTA1	syntrophin alpha 1
SPHK1	sphingosine kinase 1
STK3	serine/threonine kinase 3
TALDO1	transaldolase 1
TARS	threonyl-tRNA synthetase
TF	transferrin
TRPM6	transient receptor potential cation channel subfamily M member 6
TXNDC16	thioredoxin domain containing 16
ULK1	unc-51 like autophagy activating kinase
UPB1	beta-ureidopropionase 1
XYLB	xylulokinase

## Sheet: Table S8
Table S8. Kegg pathway analysis using DAVID based on sub-list of 149 metabolic-related DEG with FC≥1.2 and FDR P >0.05 between cows with LOW IGF1 (<35ng/ml, n=35) and HIGH IGF1 (>100 ng/ml, n=43) in leukocytes of cows at 14 days in milk, based on the global transcriptome
Term	Count	%	PValue	List Total	Pop Hits	Pop Total	Fold Enrichment	Benjamini	FDR	Genes
bta01100:Metabolic pathways	44	27.3292	9.55535e-11	99	1235	7550	2.71705	1.7773e-08	1.72952e-08	DGKG, ALAS2, PDXK, MAOA, HEXB, DPYS, AK4, PYGM, COMT, ABO, CNDP1, CNDP2, ALAD, LDHA, B3GALT2, ME1, ME3, CKB, ATP6V1G3, XYLB, GGT5, ST6GAL1, MGAM, GK, ST8SIA1, IDH1, SPHK1, GPT2, TALDO1, PGD, UPB1, ASS1, GALC, BST1, GATM, COQ2, PC, PKM, CPS1, DPYD, B4GALT6, BCAT2, DGKH
bta01230:Biosynthesis of amino acids	8	4.96894	3.37584e-05	99	71	7550	8.59297	0.00313953	0.00305513	PC, PKM, CPS1, IDH1, GPT2, TALDO1, ASS1, BCAT2
bta01200:Carbon metabolism	9	5.59006	7.81582e-05	99	109	7550	6.29691	0.00484581	0.00471554	PC, PKM, CPS1, IDH1, GPT2, ME1, TALDO1, ME3, PGD
bta02010:ABC transporters	6	3.72671	0.00019337	99	42	7550	10.8947	0.00899172	0.00875001	ABCA10, ABCA5, ABCA6, ABCA3, ABCA9, ABCG1
bta00410:beta-Alanine metabolism	5	3.10559	0.000918249	99	34	7550	11.2151	0.0341589	0.0332406	DPYS, DPYD, UPB1, CNDP1, CNDP2
bta00620:Pyruvate metabolism	5	3.10559	0.00140473	99	38	7550	10.0346	0.0399159	0.0388429	LDHA, PC, PKM, ME1, ME3
bta00770:Pantothenate and CoA biosynthesis	4	2.48447	0.00150221	99	18	7550	16.9473	0.0399159	0.0388429	DPYS, DPYD, UPB1, BCAT2

## Sheet: Table S9
Table S9. Lists of genes in significant KEGG pathways from analysis using DAVID based on list of 149 metabolic-related DEG with FC≥1.2 and FDR P >0.05 between cows with LOW IGF1
(<35ng/ml, n=35) and HIGH IGF1 (>100 ng/ml, n=43) in leukocytes of cows at 14 days in milk, based on the global transcriptome.
Genes up-regulated in LOW IGF1 cows shown in RED, genes down-regulated shown in GREEN.
bta01100:	bta01230:	bta01200:	bta02010:	bta00410:	bta00620:	bta00770:
Metabolic pathways	Biosynthesis of amino acids	Carbon metabolism	ABC transporters	beta-Alanine metabolism	Pyruvate metabolism	Pantothenate and CoA biosynthesis
ABO	ASS1	CPS1	ABCA1	CNDP1	LDHA	BCAT2
AK4	BCAT2	GPT2	ABCA3	CNDP2	ME1	DPYD
ALAD	CPS1	IDH1	ABCA5	DPYD	ME3	DPYS
ALAS2	GPT2	ME1	ABCA6	DPYS	PC	UPB1
ASS1	IDH1	ME3	ABCA9	UPB1	PKM
ATP6V1G3	PC	PC	ABCG10
B3GALT2	PKM	PGD
B4GALT6	TALDO1	PKM
BCAT2		TALDO1
BST1
CKB
CNDP1
CNDP2
COMT
COQ2
CPS1
DGKG
DGKH
DPYD
DPYS
GALC
GATM
GGT5
GK
GPT2
HEXB
IDH1
LDHA,
MAOA
ME1
ME3
MGAM
PC
PDXK
PGD
PKM
PYGM
SPHK1
ST6GAL1
ST8SIA1
TALDO1
UPB1
XYLB
